# Supplementary material
Source: publisher figshare collection journal article supplement (https://gsajournals.figshare.com/articles/dataset/_/11323088)
Supplement: Supplementary file 4 [file 1]

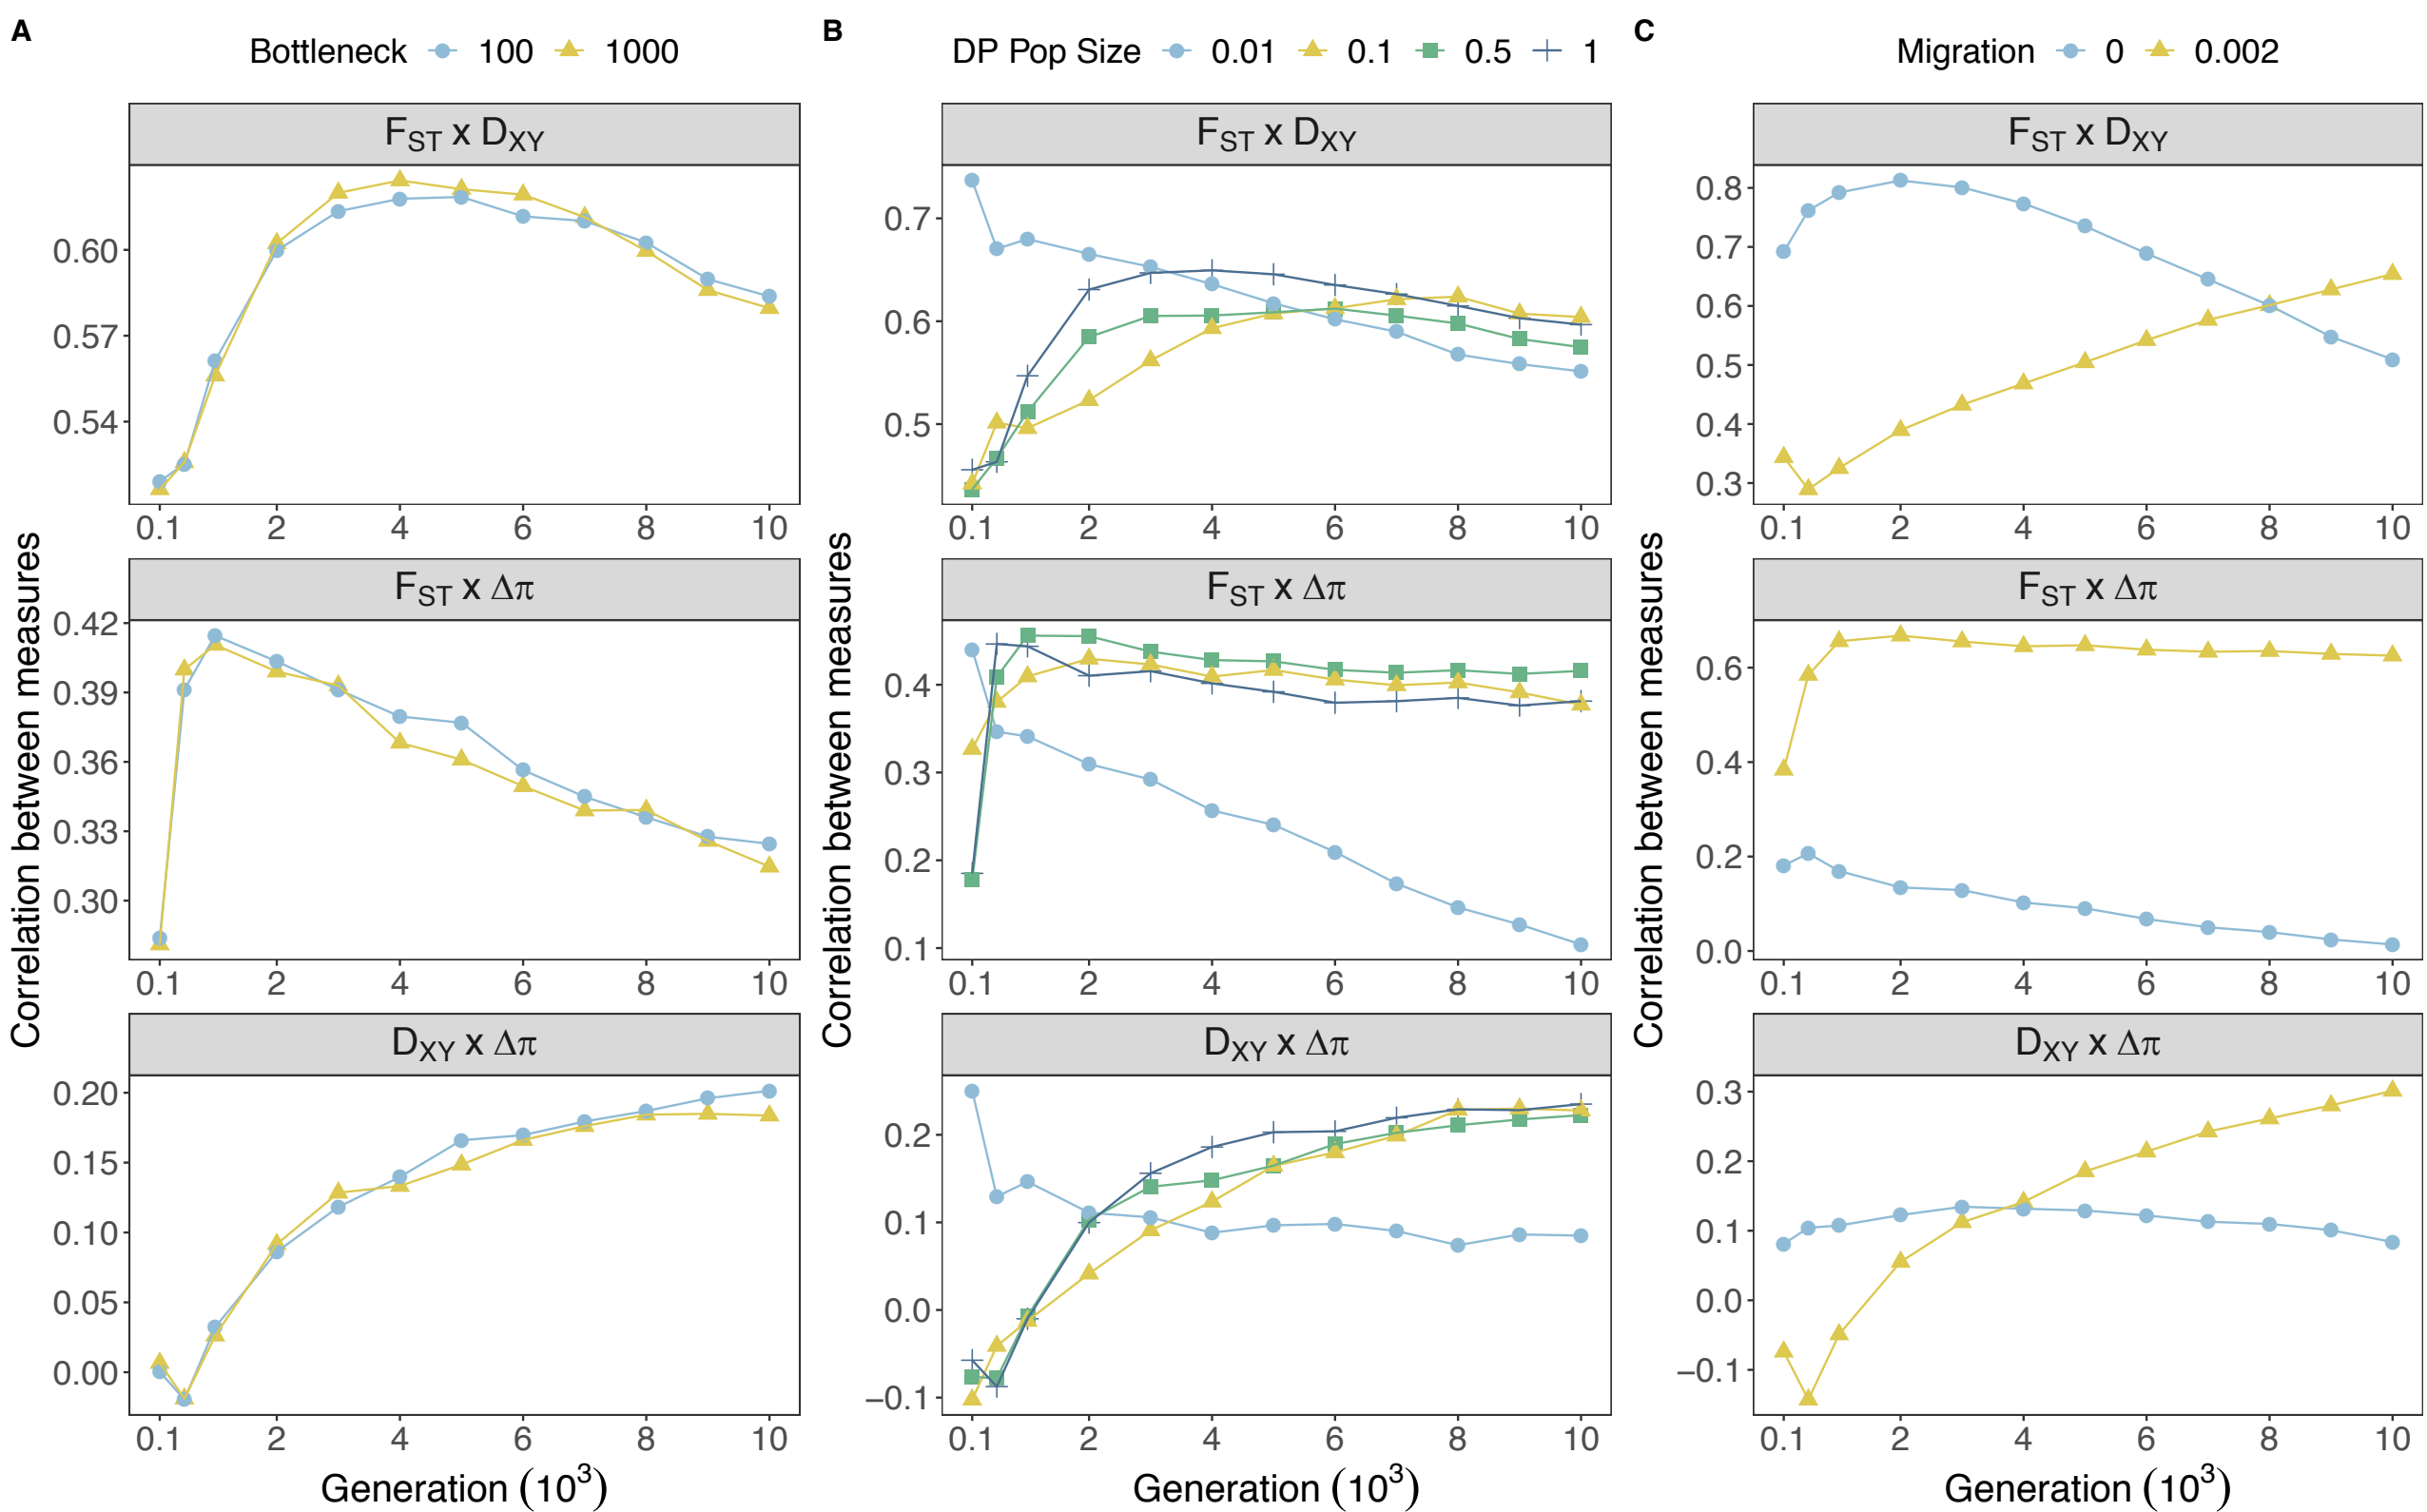

**Figure S25:** Effects of demographic treatments on the relationship between measures of genetic divergence across all sampling generations for  $\mu = 4.89e^{-7}$  simulations. Point colour and shape denote treatment groups for founding bottlenecks (**A**), prolonged bottlenecks (**B**) and migration (**C**). Each point represents correlation coefficients calculated across all genes within individual treatments groups, averaged within treatment levels, and averaged over 20 iterations.
