# Supplementary material
Source: publisher figshare collection journal article supplement (https://gsajournals.figshare.com/articles/dataset/_/11323088)
Supplement: Supplementary file 6 [file 1]

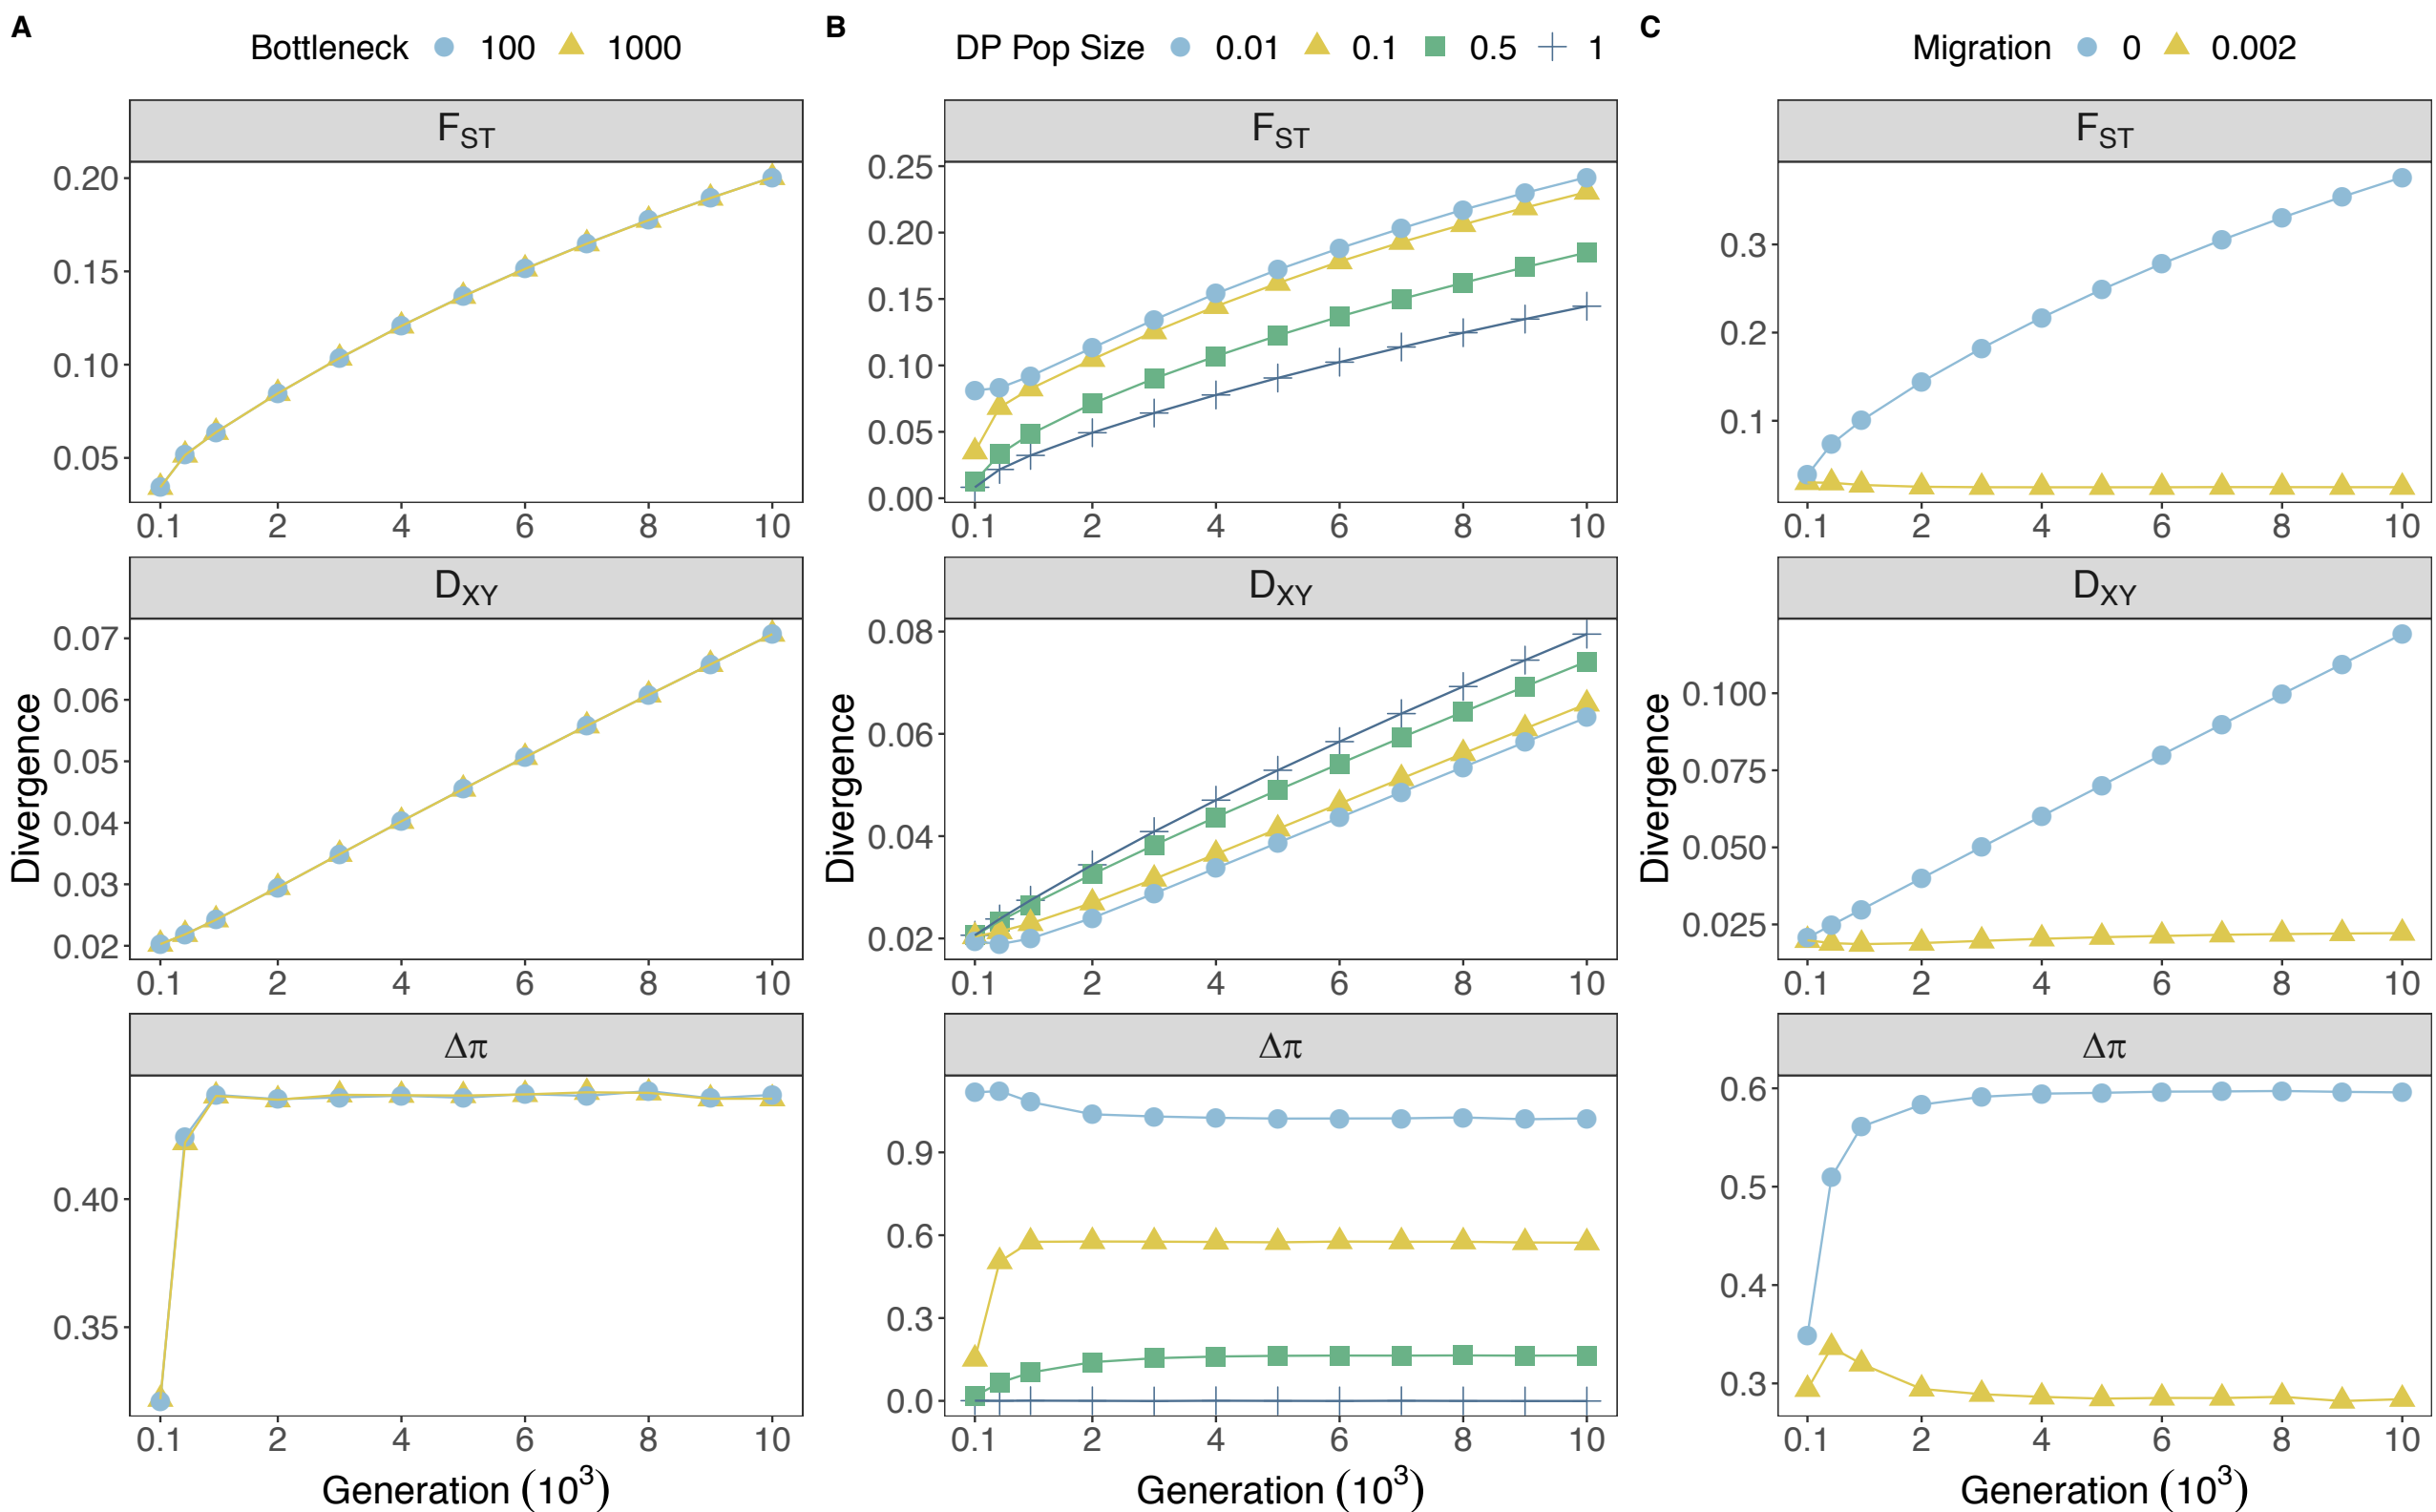

**Figure S2:** Effects of demographic treatments on measures of genetic divergence across all sampling generations for neutral simulations. Point colour and shape denote treatment groups for founding bottlenecks (**A**), prolonged bottlenecks (**B**) and migration (**C**). Each point represents values of divergence averaged across all genes within individual treatments groups, averaged within treatment levels, and averaged over 20 iterations.
