# Supplementary material
Source: publisher figshare collection journal article supplement (https://gsajournals.figshare.com/articles/dataset/_/11323088)
Supplement: Supplementary file 8 [file 1]

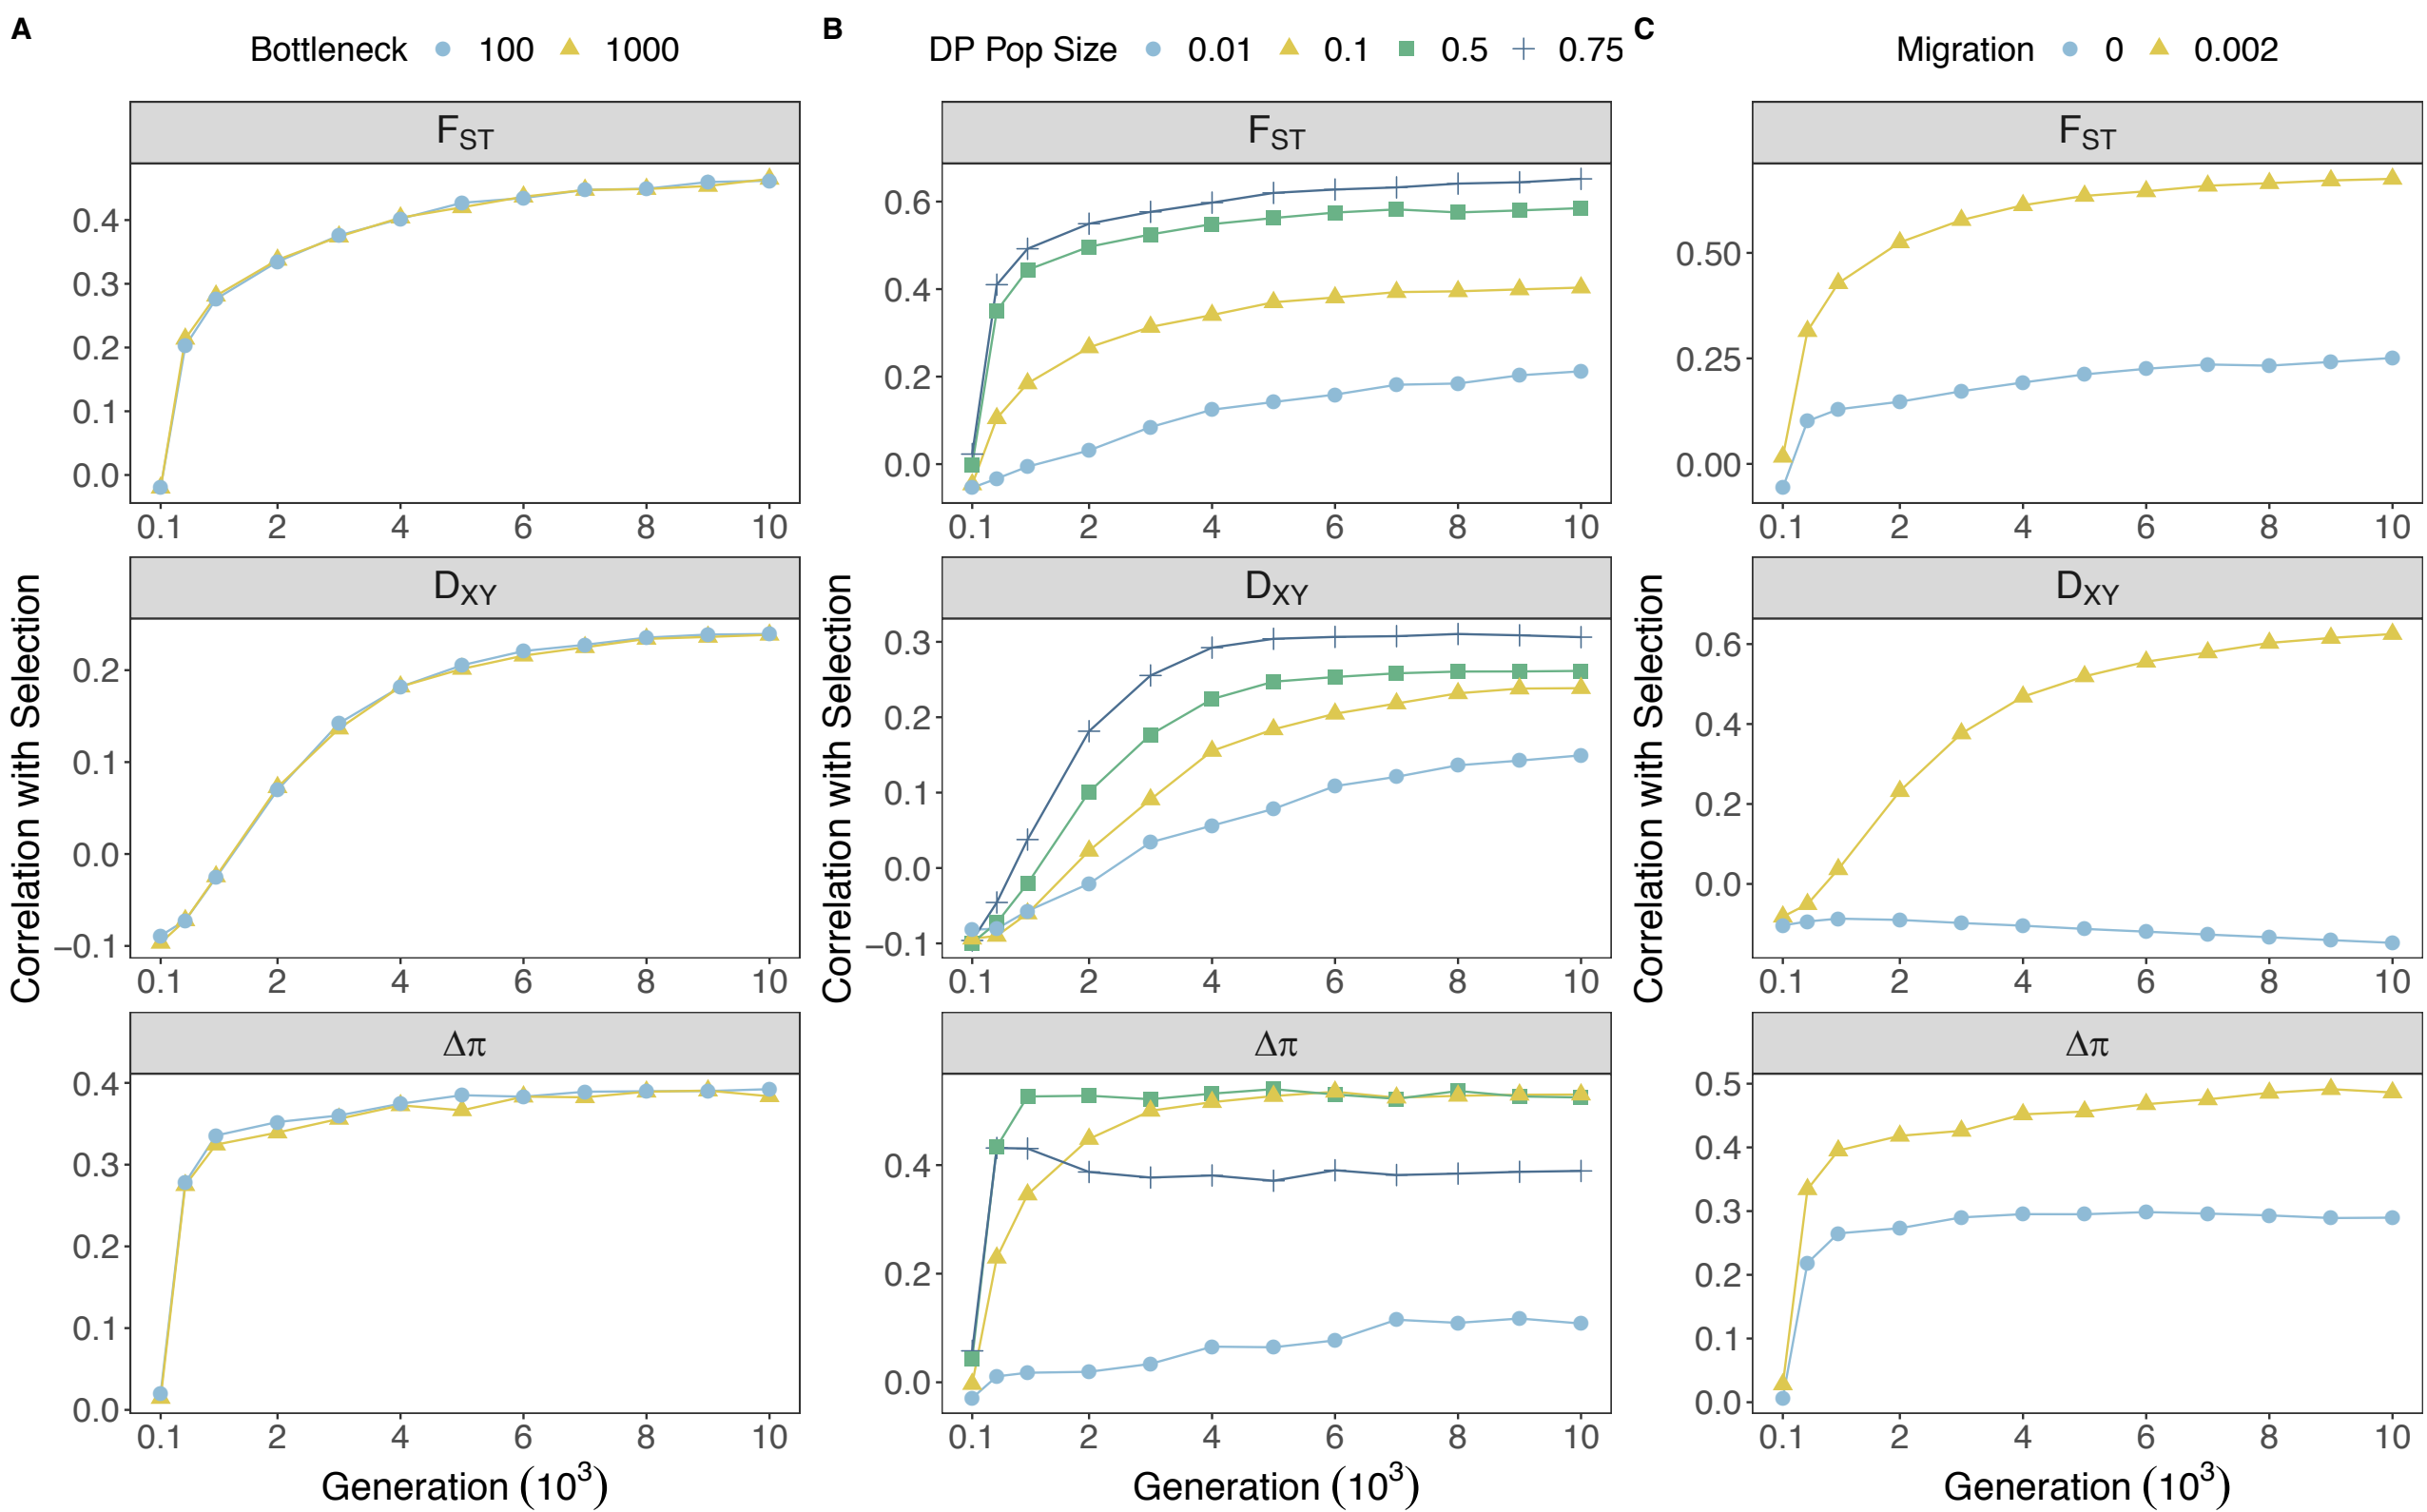

**Figure S48:** Effects of demographic treatments on the relationship between selection and measures of genetic divergence across all sampling generations for simulations without expansions (Total  $N = 1000$ ). Point colour and shape denote treatment groups for founding bottlenecks (**A**), prolonged bottlenecks (**B**) and migration (**C**). Each point represents correlation coefficients calculated across all genes within individual treatment groups, averaged within treatment levels, and averaged over 20 iterations.
