# Supplementary material
Source: publisher figshare collection journal article supplement (https://gsajournals.figshare.com/articles/dataset/_/11323088)
Supplement: Supplementary file 12 [file 1]

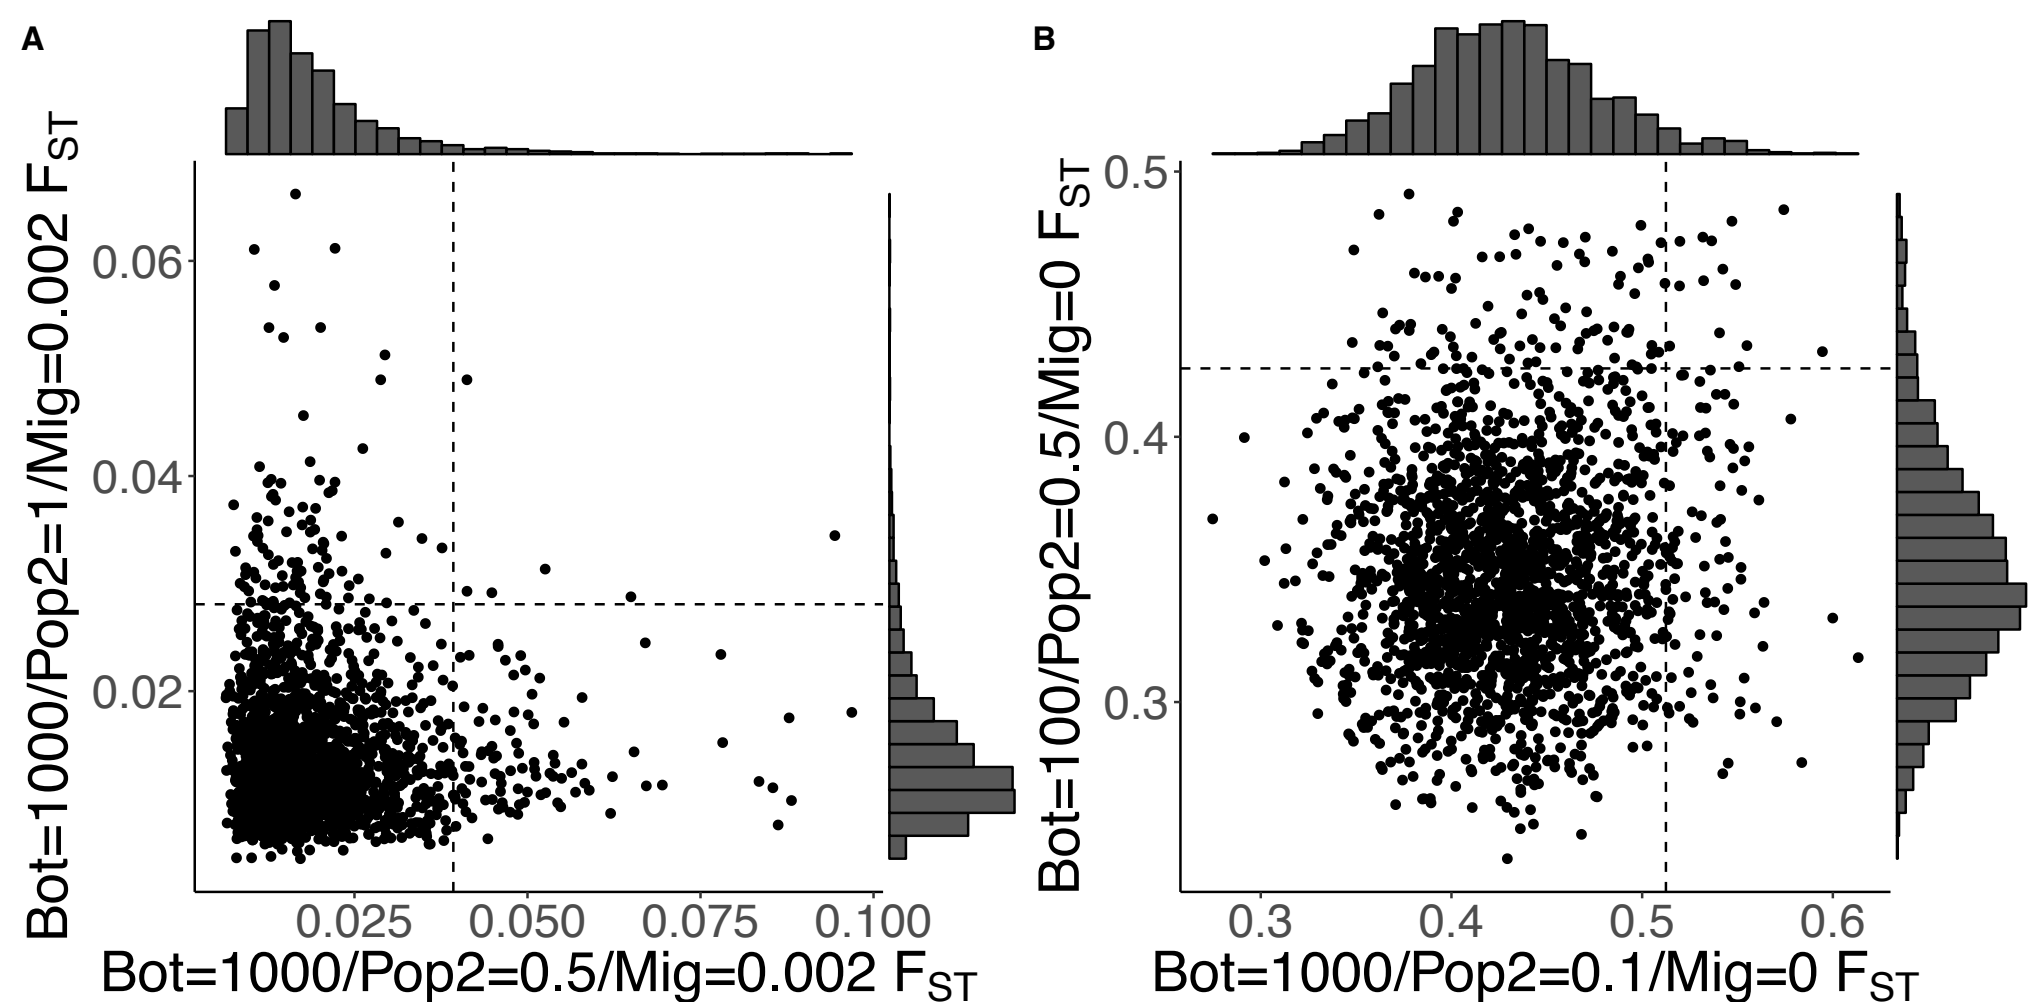

**Figure S39:** The effect of migration on distributions of  $F_{ST}$  and their random overlap. Data are plotted for  $F_{ST}$  calculated over the 20 iterations of 100 genomic windows under neutrality. Shown are the overlap between two treatments with (A) and without (B) migration. In each figure, 95% quantiles are plotted for each distribution as dashed lines. Distributions for x and y data are plotted in axis margins.
