# Supplementary material
Source: publisher figshare collection journal article supplement (https://gsajournals.figshare.com/articles/dataset/_/11323088)
Supplement: Supplementary file 16 [file 1]

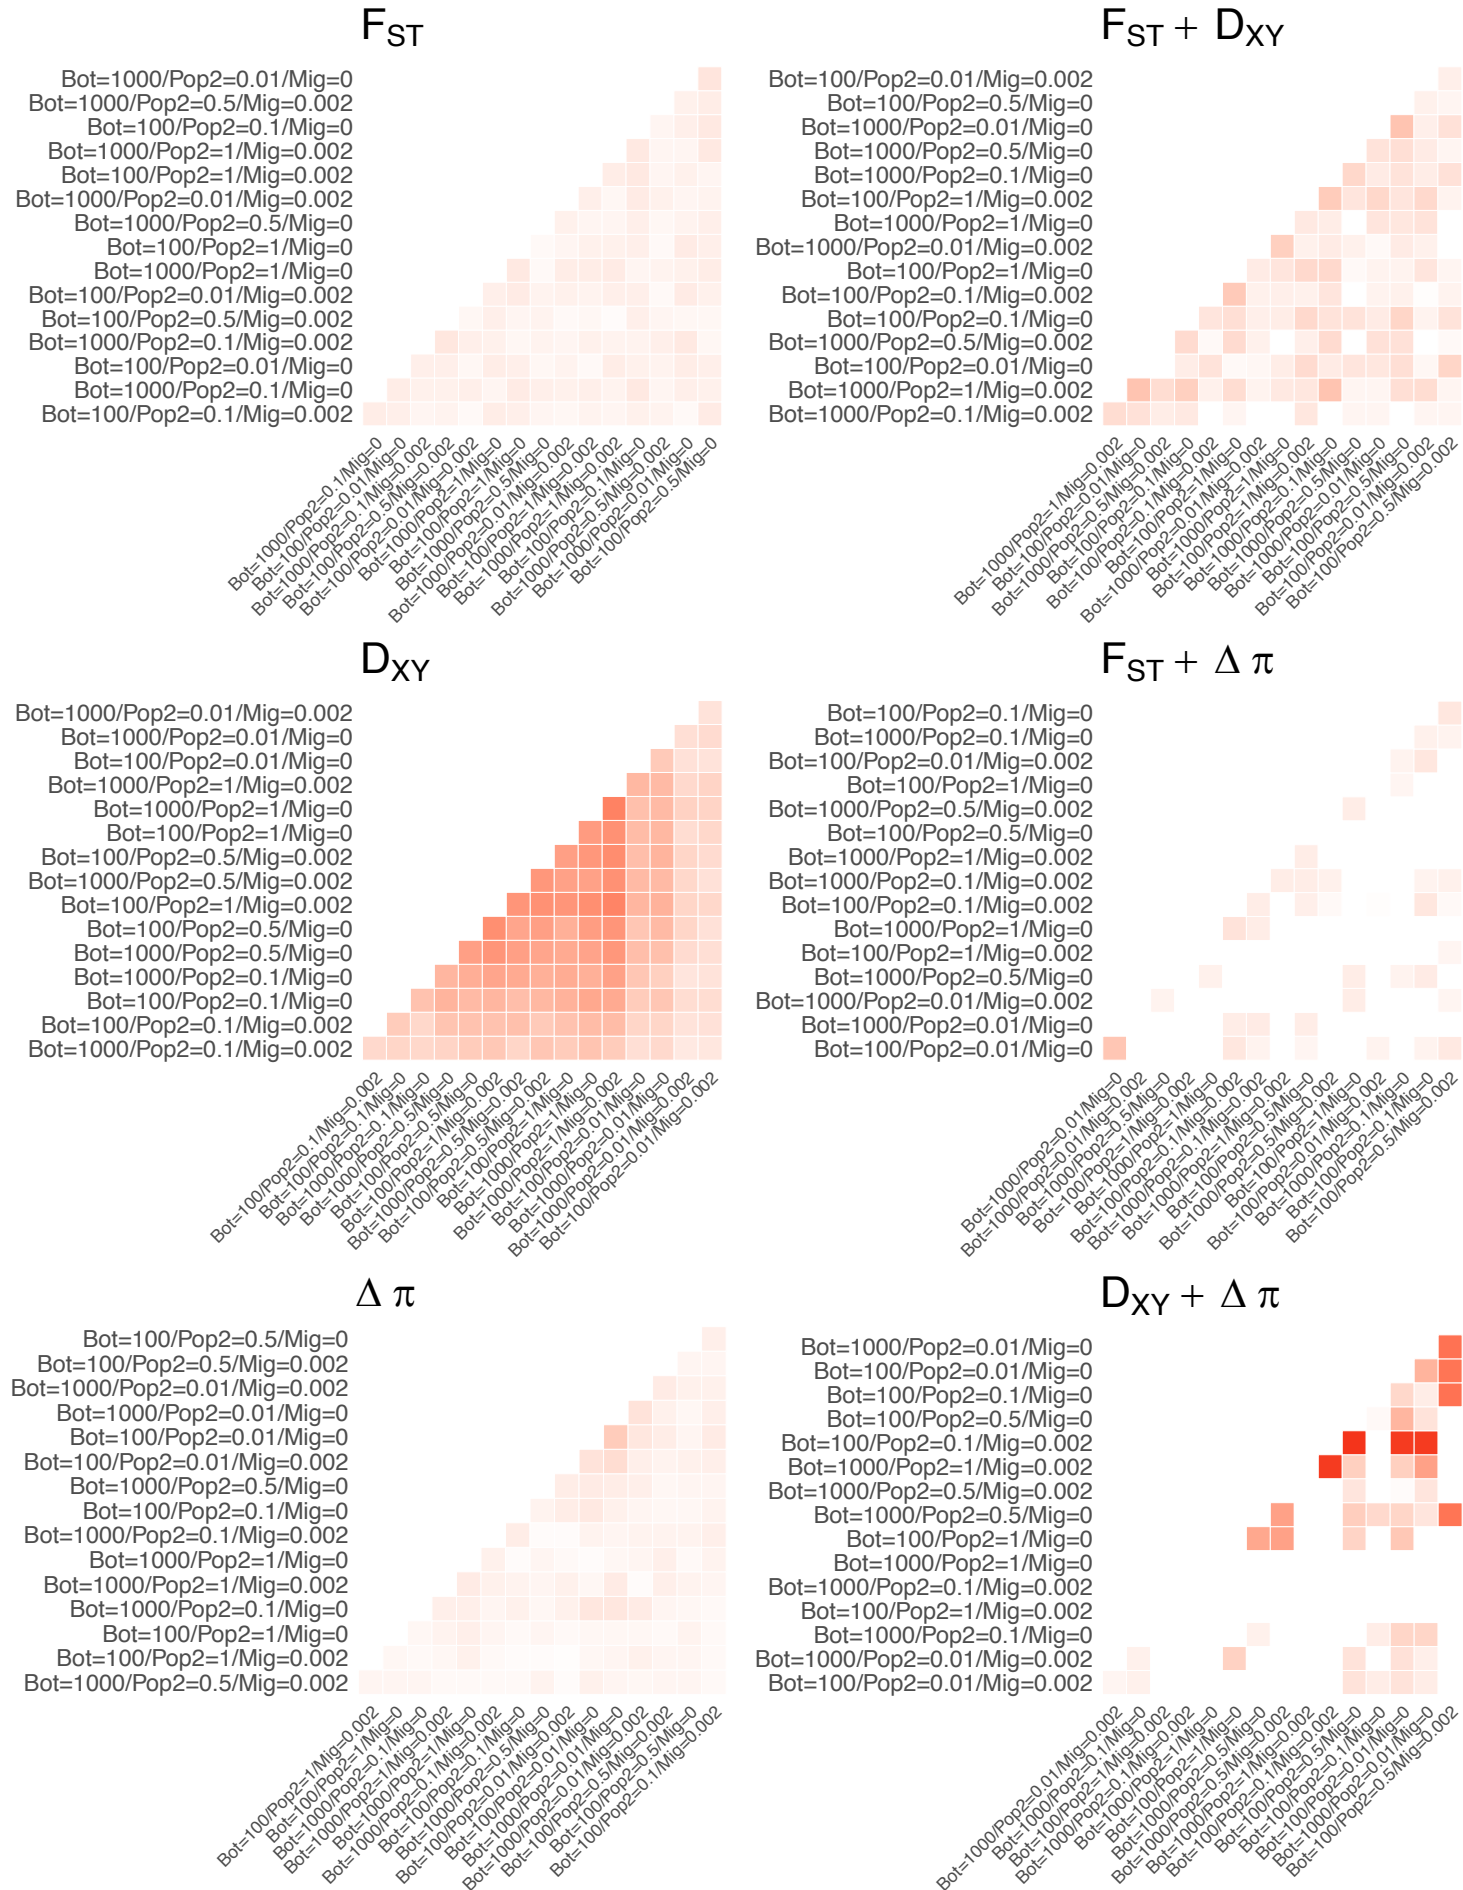

**Figure S34:** The proportional overlap of outliers above the 95% quantile of 100% neutral data for each of the 16 demographic treatments after 500 generations. Axis orderings were determined through hierarchical clustering. Heatmaps are shown for single measures of  $F_{ST}$ ,  $D_{XY}$  and  $\Delta\pi$  in the first column, and combined measures in the second column. Heatmaps are coloured according to a common scale of 0 to 1. Treatments are labelled with founding bottleneck (Bot), DP population size (Pop2), and migration (Mig) values.
