# Supplementary material
Source: publisher figshare collection journal article supplement (https://gsajournals.figshare.com/articles/dataset/_/11323088)
Supplement: Supplementary file 22 [file 1]

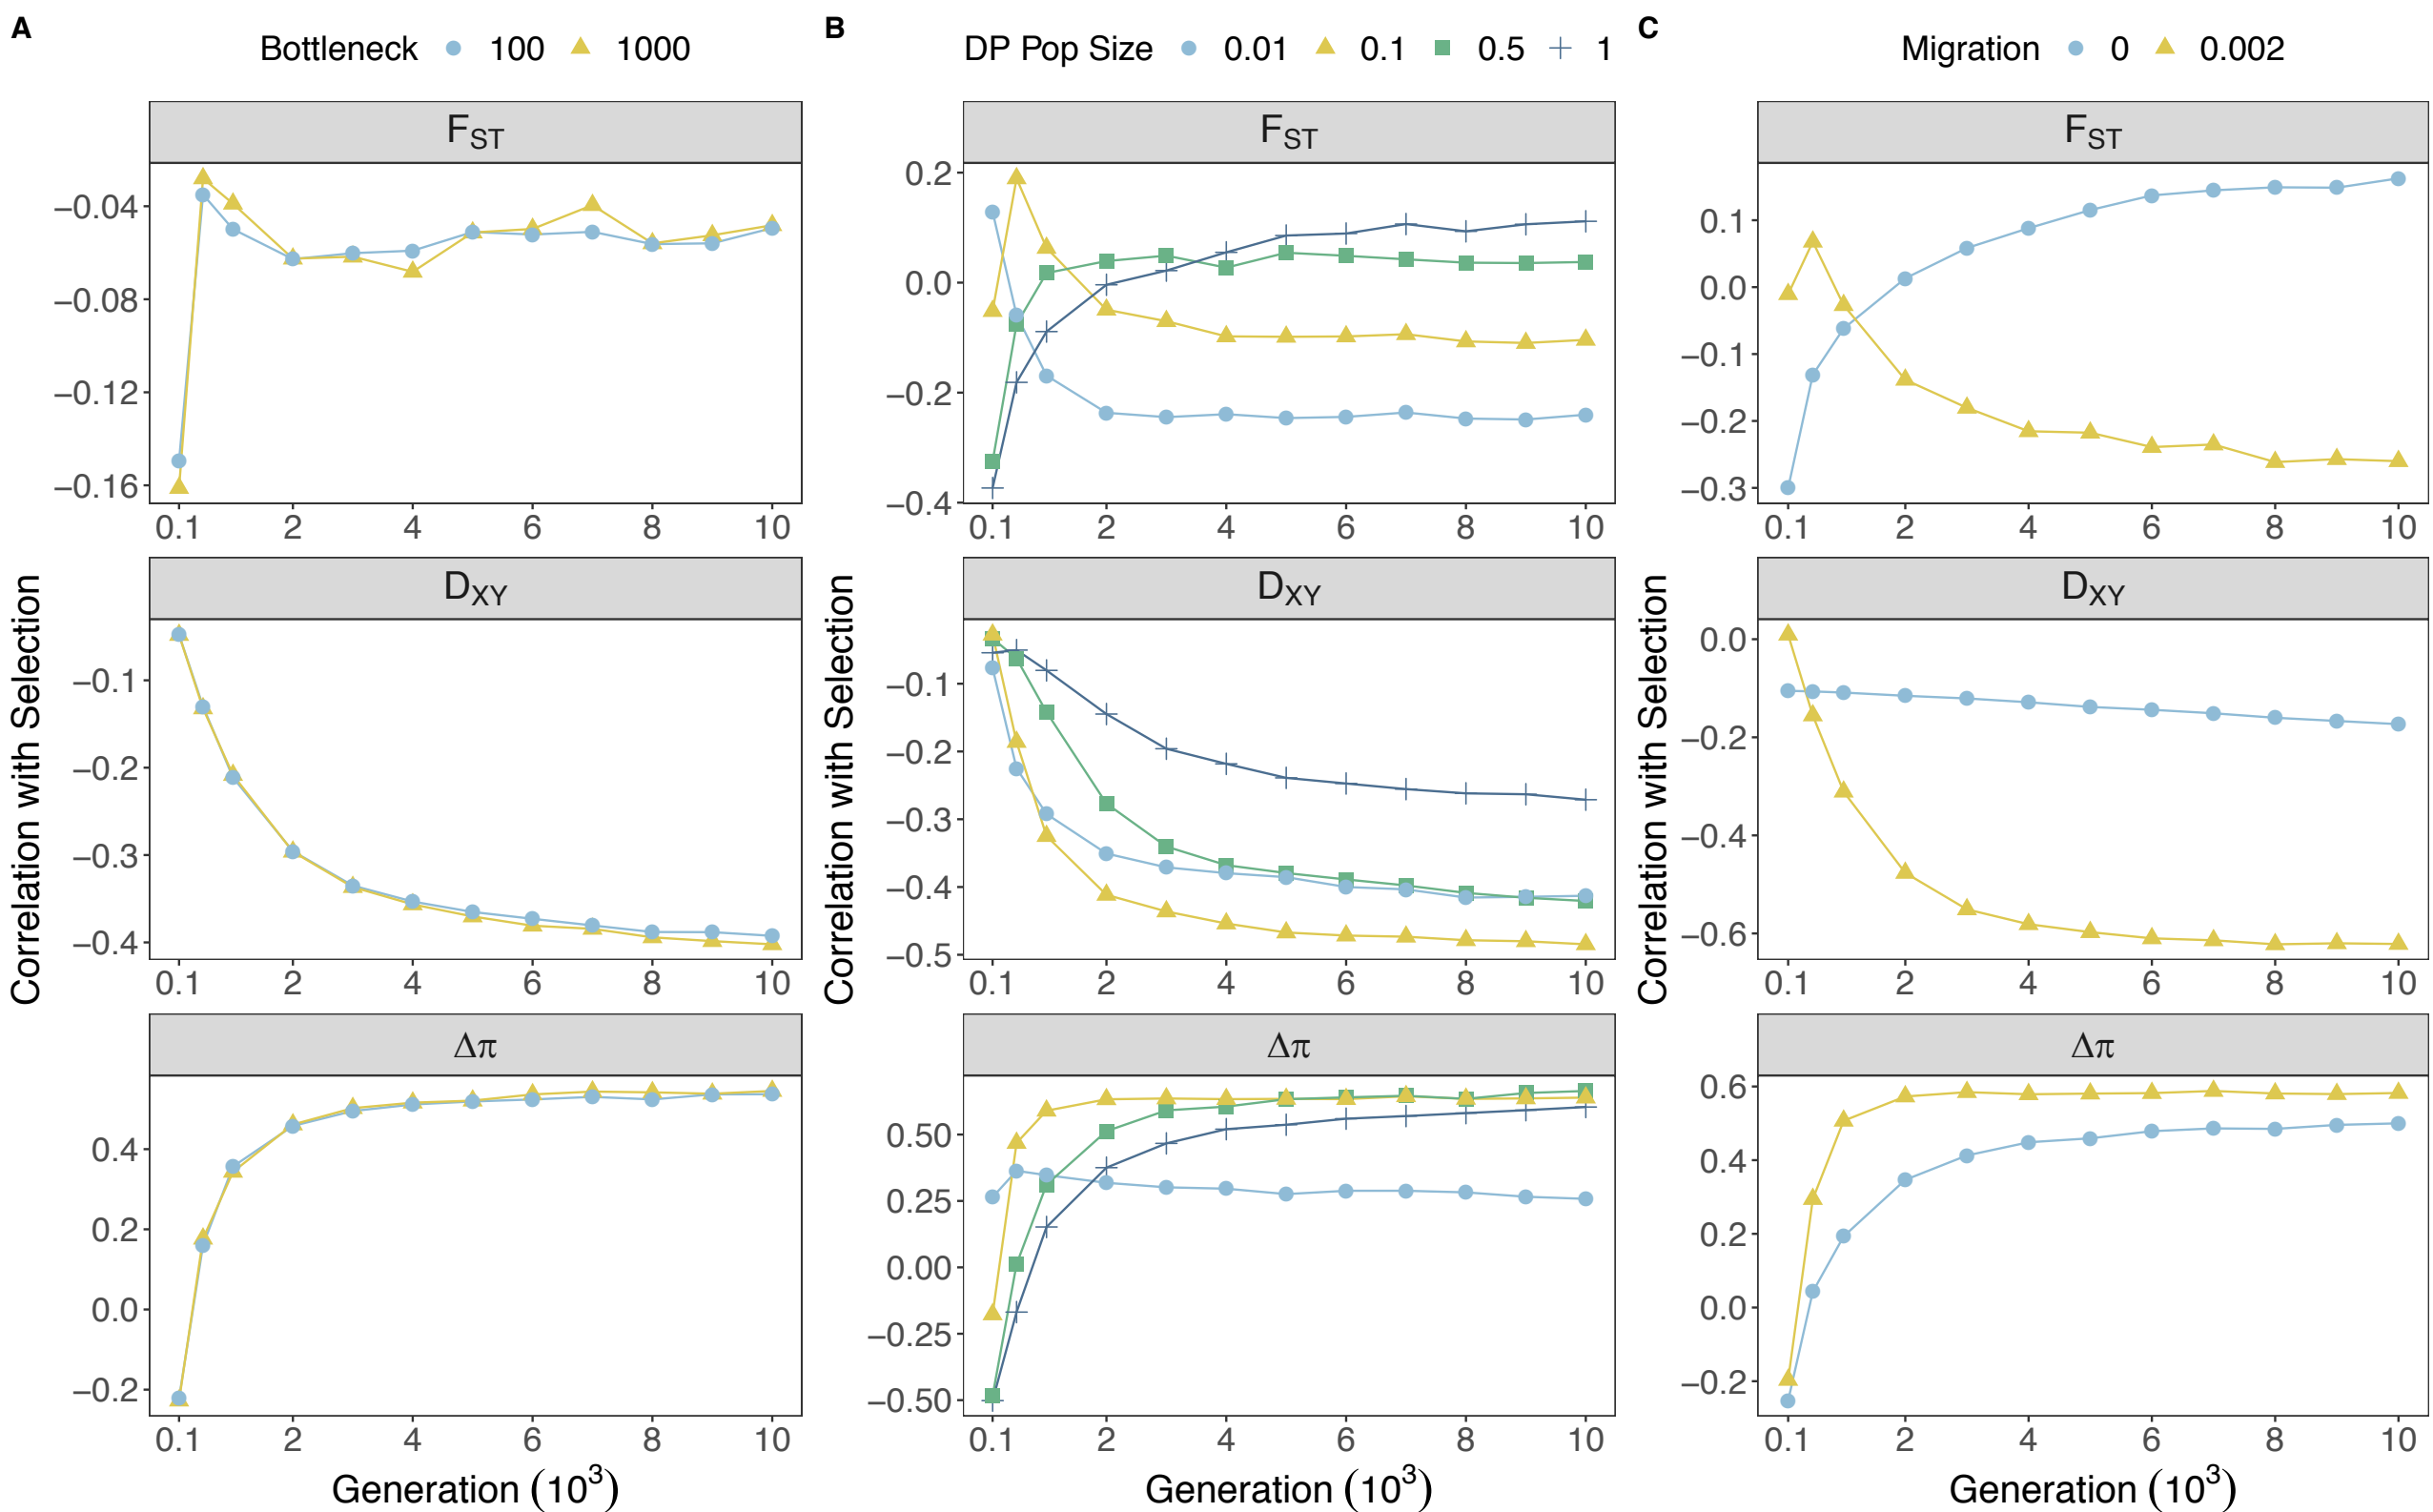

**Figure S5:** Effects of demographic treatments on the relationship between selection and measures of genetic divergence across all sampling generations for  $\text{Pheno}_{\text{Null}}$  simulations. Point colour and shape denote treatment groups for founding bottlenecks (A), prolonged bottlenecks (B) and migration (C). Each point represents correlation coefficients calculated across all genes within individual treatments groups, averaged within treatment levels, and averaged over 20 iterations.
