# Supplementary material
Source: publisher figshare collection journal article supplement (https://gsajournals.figshare.com/articles/dataset/_/11323088)
Supplement: Supplementary file 23 [file 1]

**A**

Bottleneck ● 100 ▲ 1000

Correlation between measures

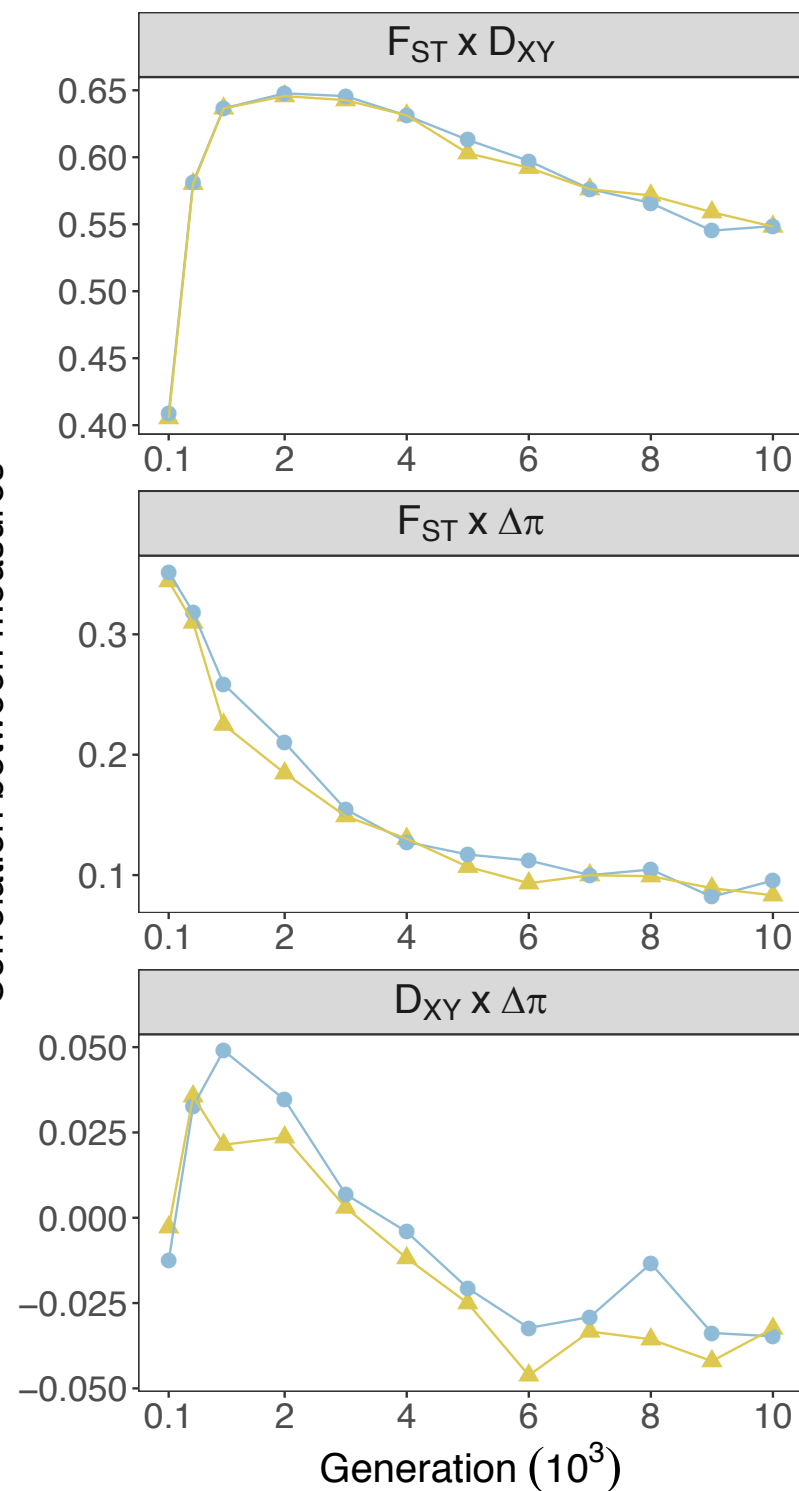**B**

DP Pop Size ● 0.01 ▲ 0.1 ■ 0.5 + 1

Correlation between measures

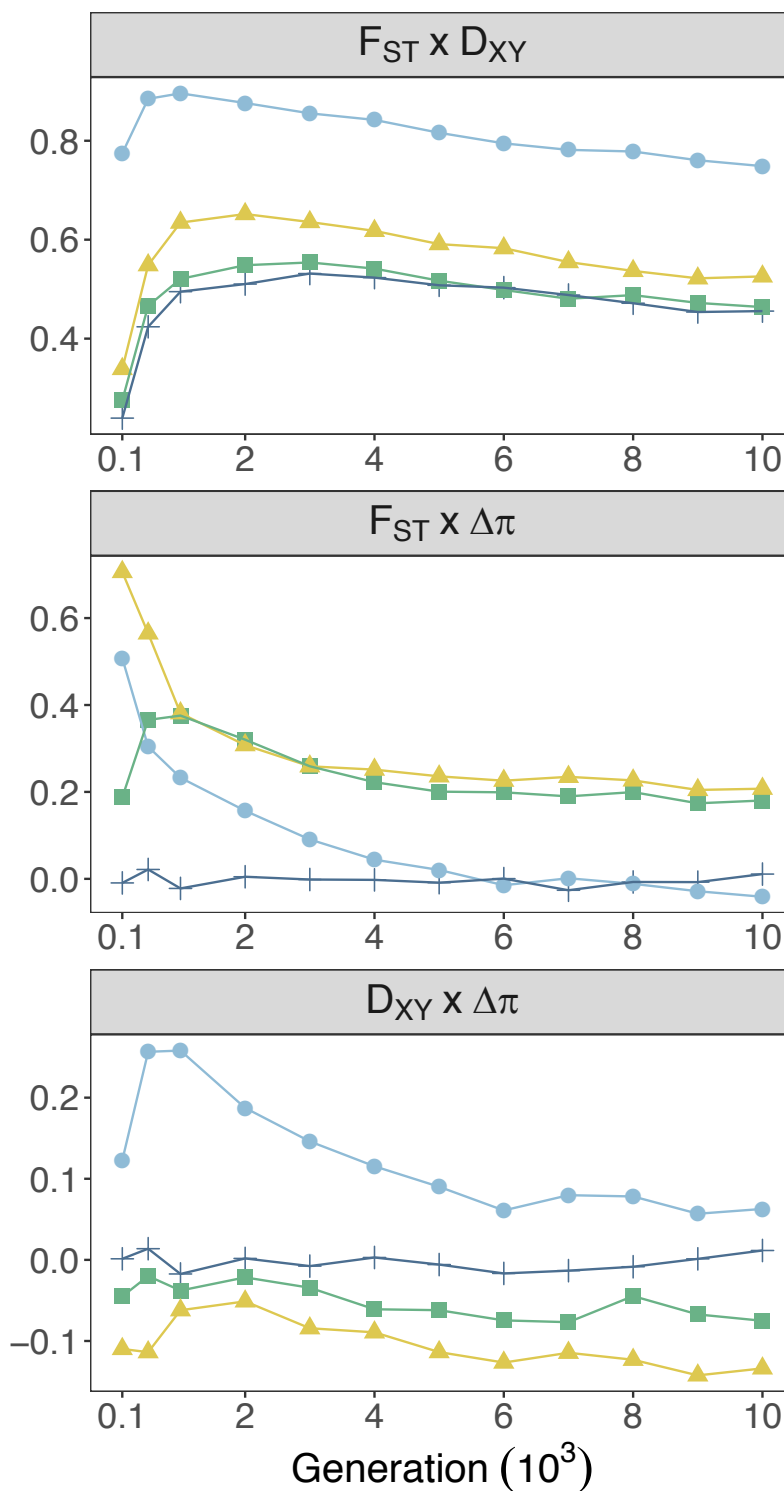**C**

Migration ● 0 ▲ 0.002

Correlation between measures

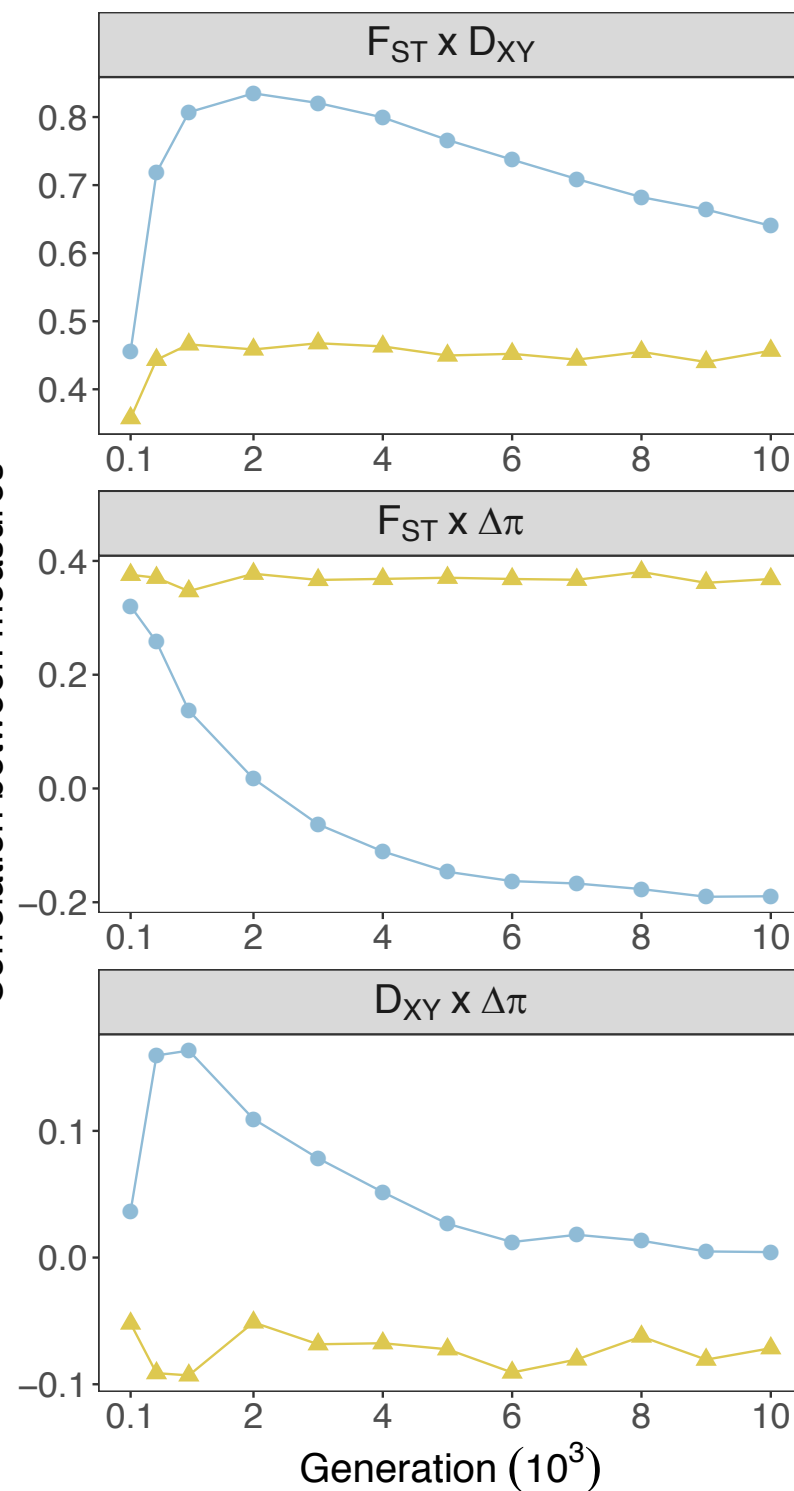

**Figure S23:** Effects of demographic treatments on the relationship between measures of genetic divergence across all sampling generations for neutral simulations. Point colour and shape denote treatment groups for founding bottlenecks (**A**), prolonged bottlenecks (**B**) and migration (**C**). Each point represents correlation coefficients calculated across all genes within individual treatments groups, averaged within treatment levels, and averaged over 20 iterations.
