# Supplementary material
Source: publisher figshare collection journal article supplement (https://gsajournals.figshare.com/articles/dataset/_/11323088)
Supplement: Supplementary file 32 [file 1]

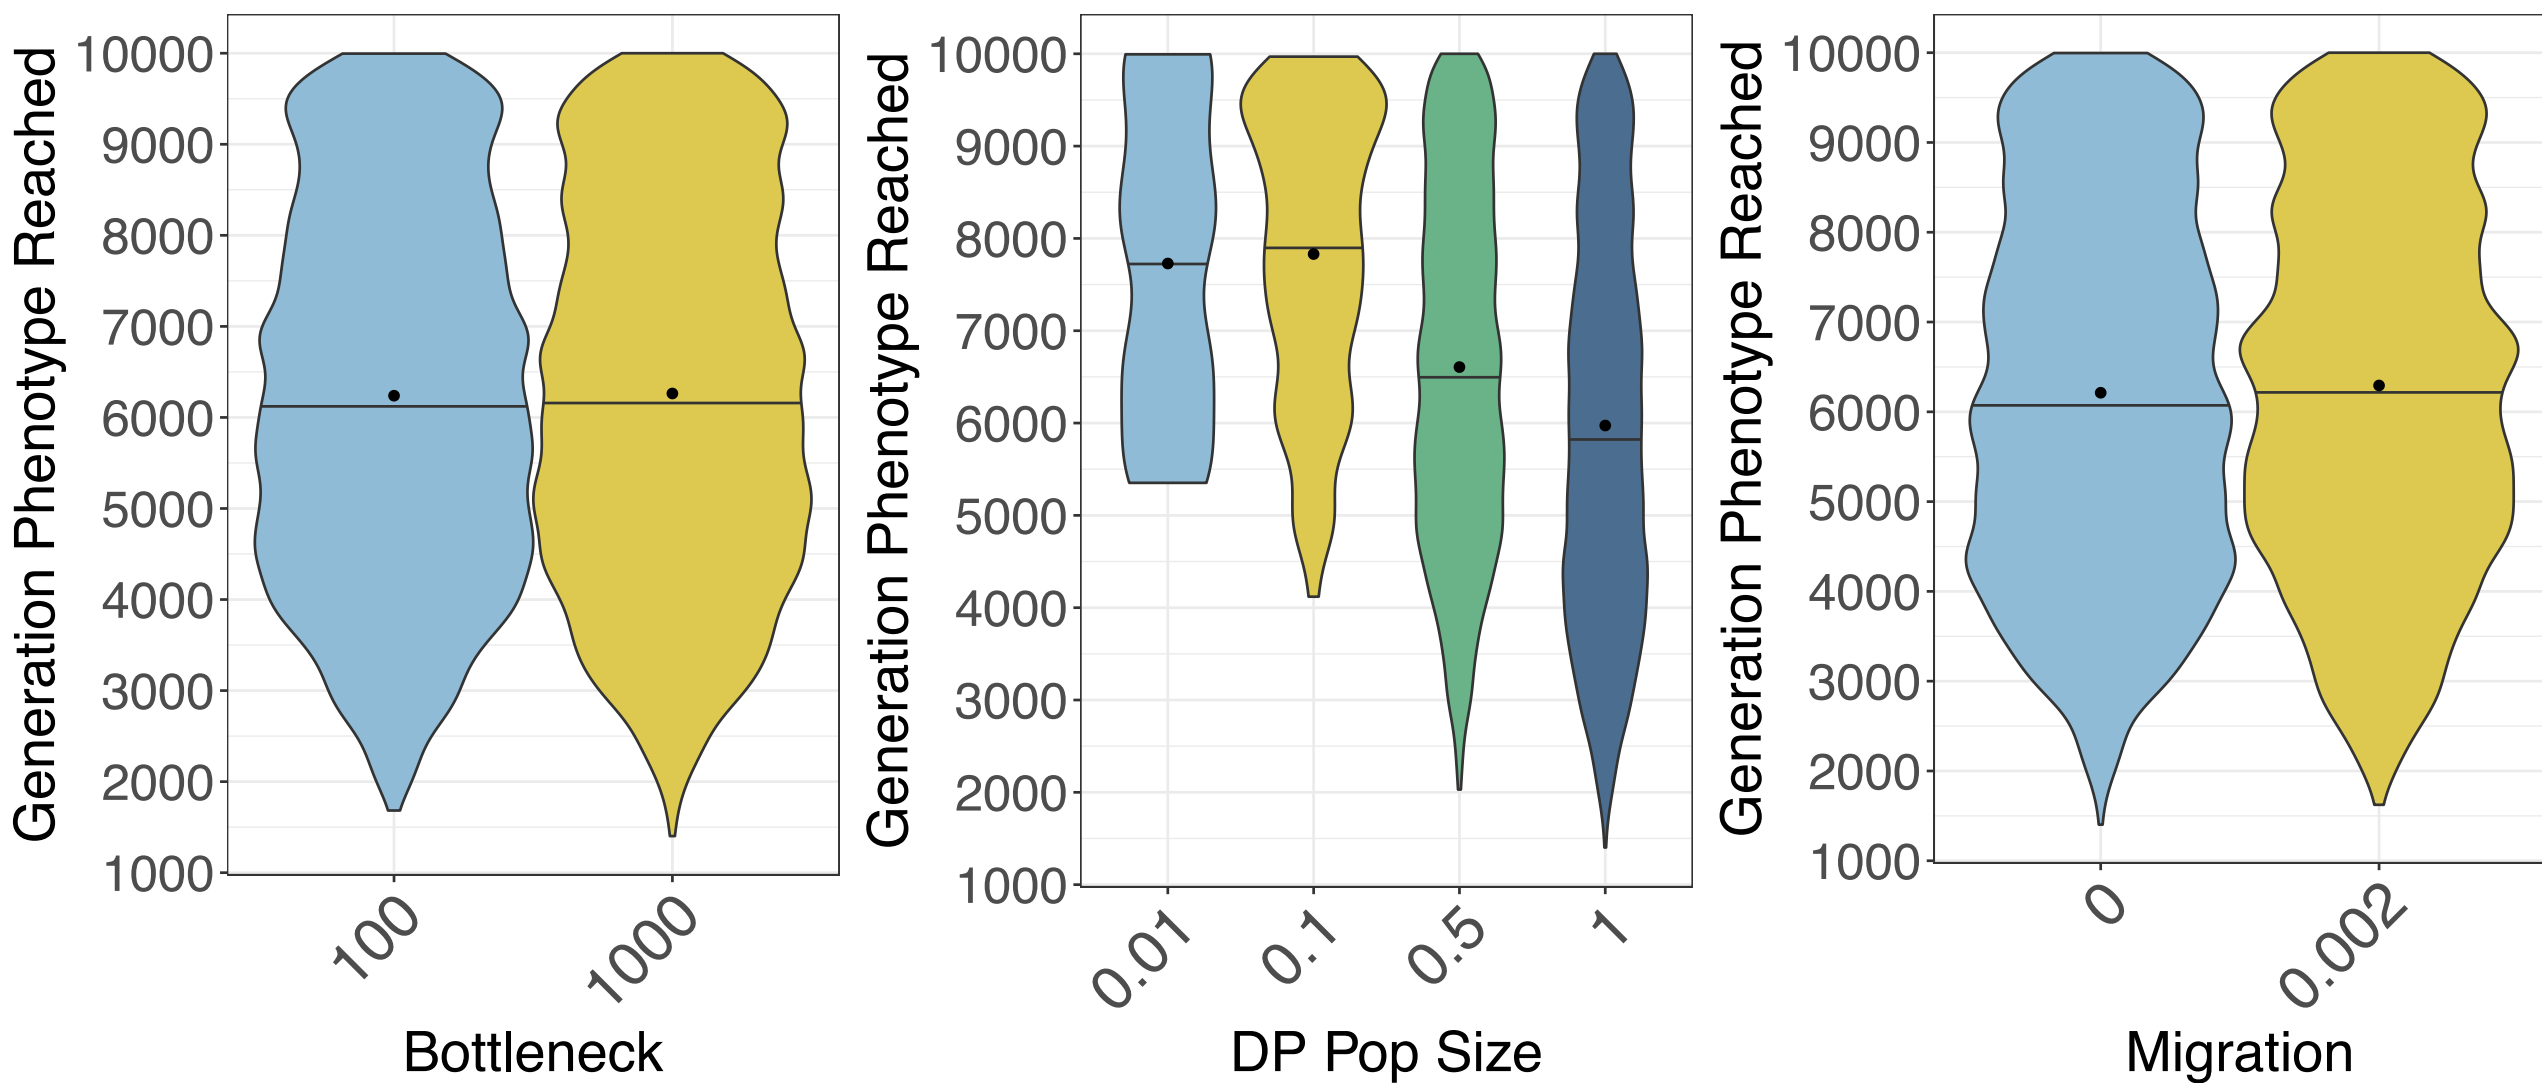

**Figure S46:** The effect of demographic treatments on the generation DP reached its phenotypic optimum (trait value > 9) for  $\mu_\sigma = 0.1$  simulations. Violins denote distributions calculated over all iterations of genome windows, organised according to founding bottlenecks, DP size, and migration. Means of distributions are marked as points, and medians are highlighted as lines through violins.
