# Supplementary material
Source: publisher figshare collection journal article supplement (https://gsajournals.figshare.com/articles/dataset/_/11323088)
Supplement: Supplementary file 33 [file 1]

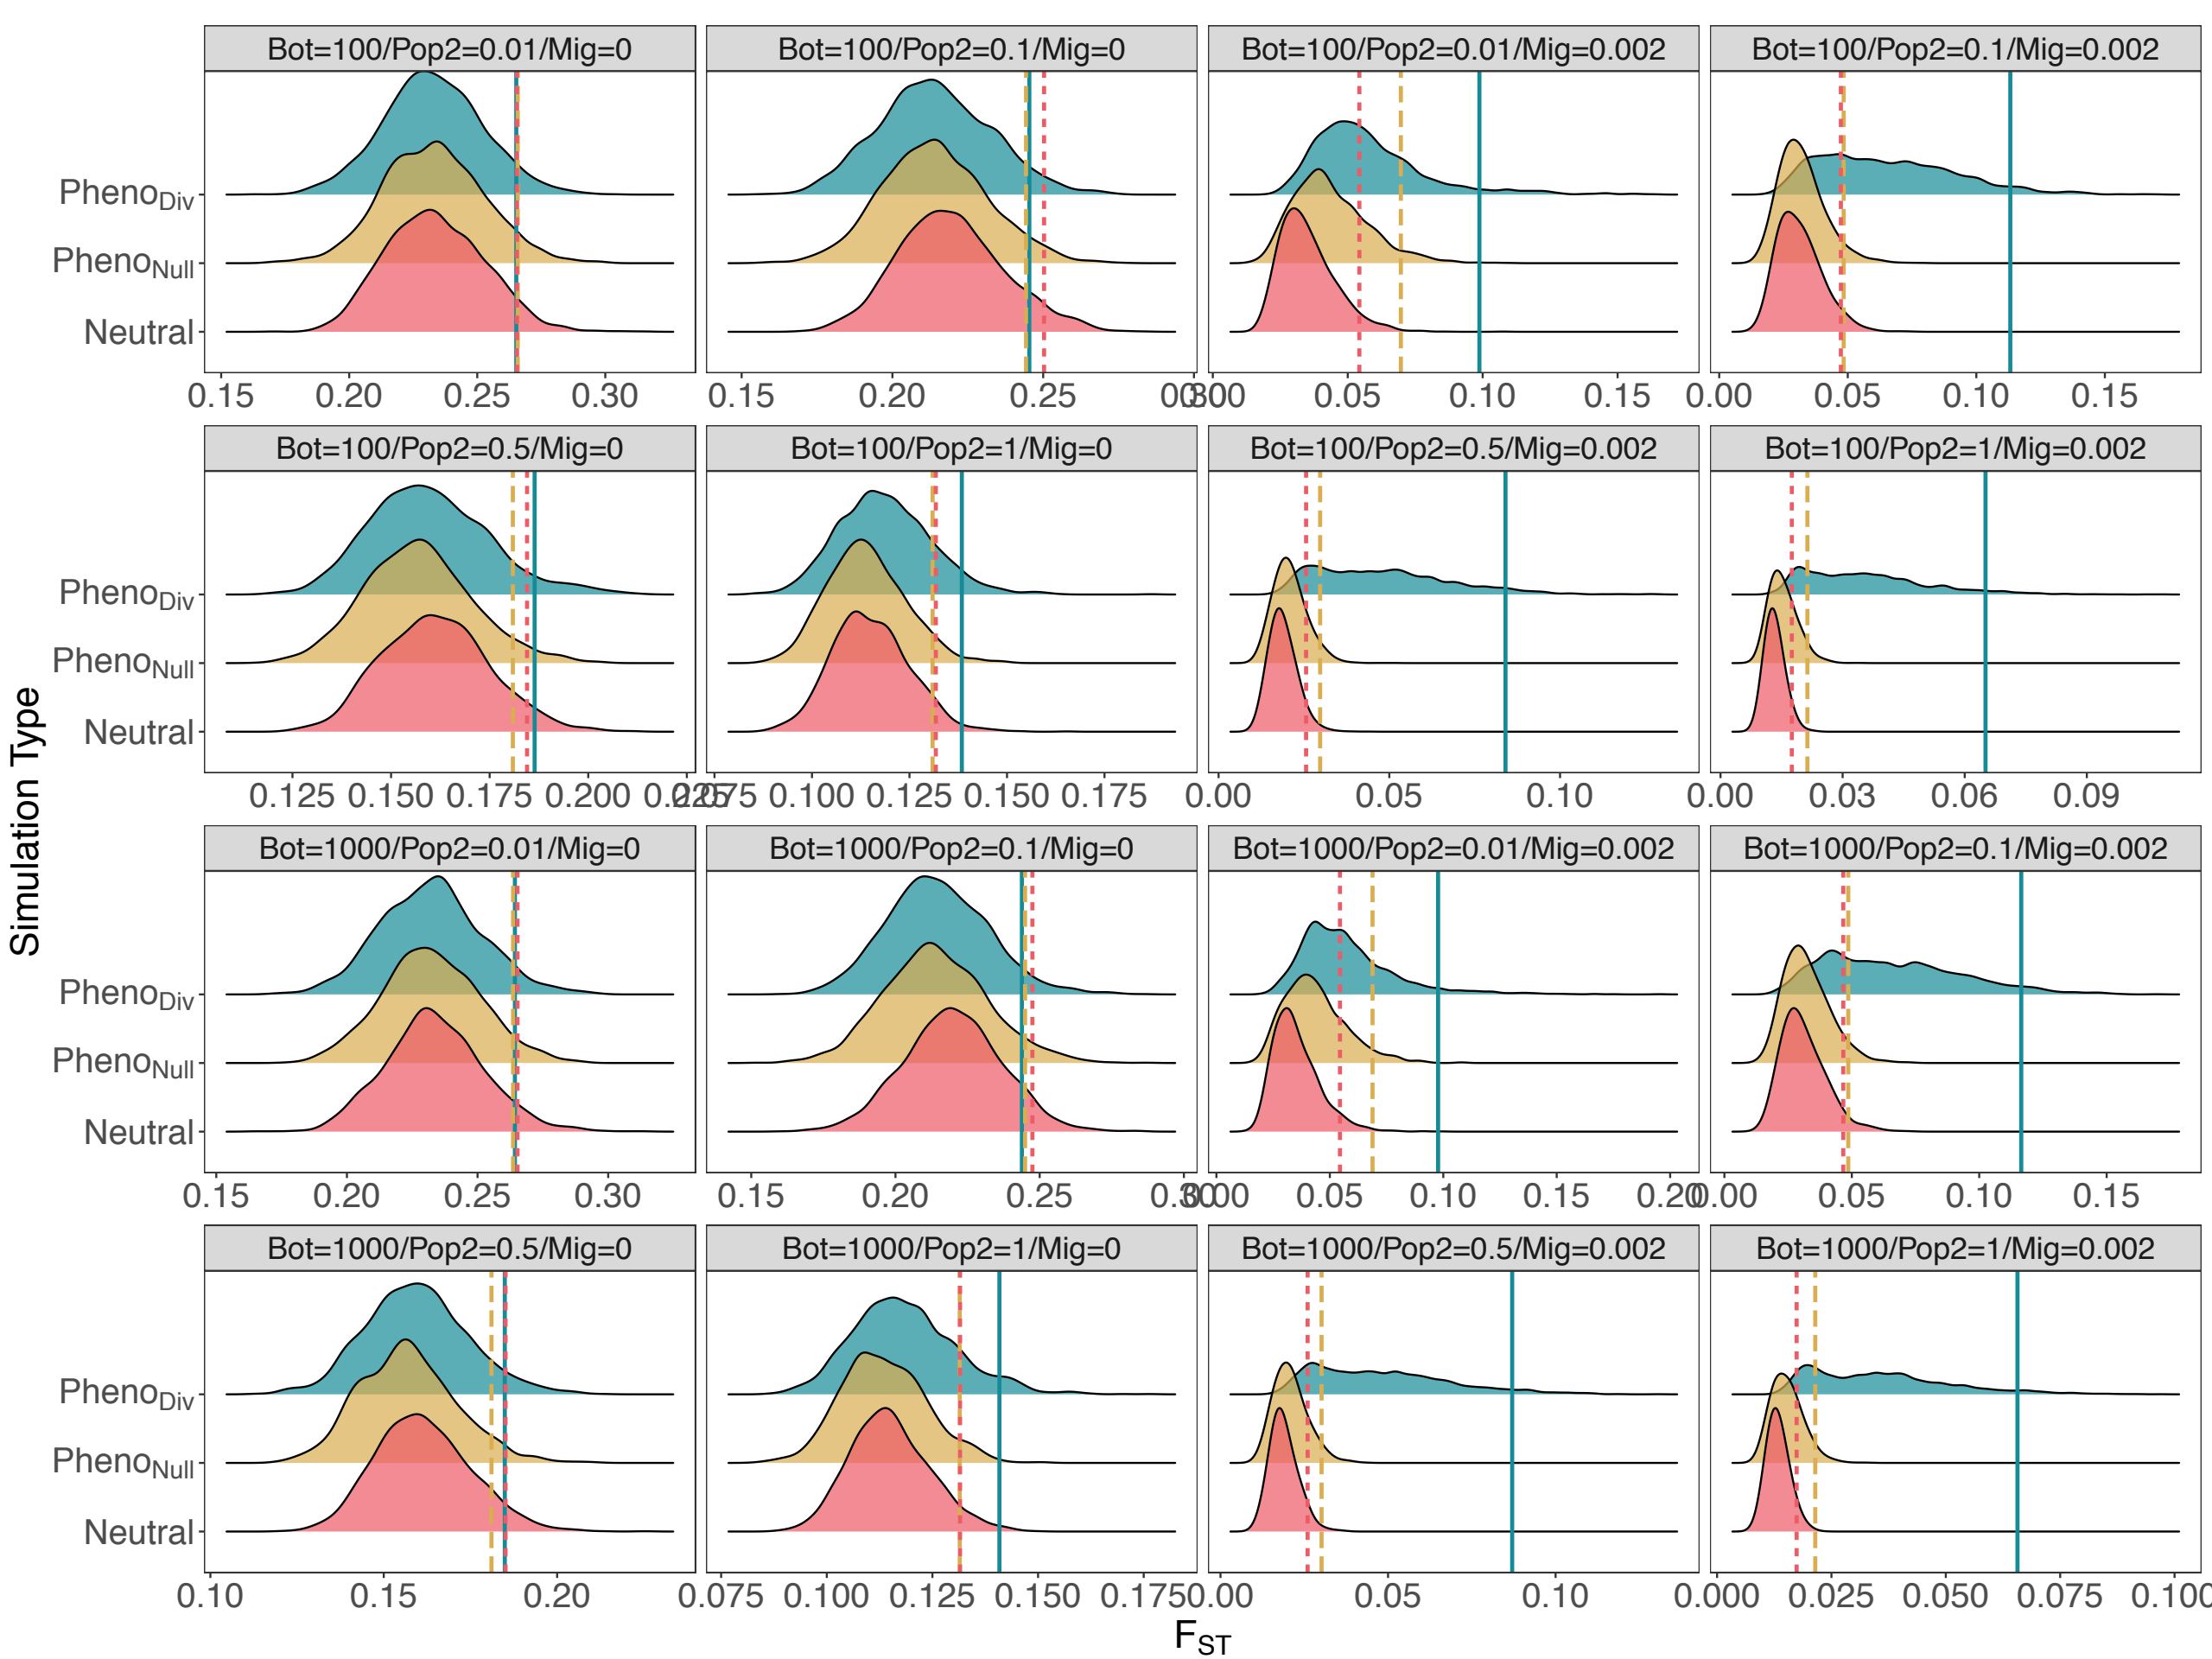

**Figure S13:** Distributions of  $F_{ST}$  under each of the 16 unique demographic treatments under three selection regimes: Pheno<sub>Div</sub> (divergent selection), Pheno<sub>Null</sub> (stabilising selection) and Neutral, after 3000 generations. Upper 5% quantiles are highlighted for each distribution, with linetype corresponding to selection: Solid = Divergent, Dashed = Stabilising, Dotted = Neutral. Each distribution represents data pooled from 20 iterations of 100 gene windows ( $N = 2000$ ).
