# Supplementary material
Source: publisher figshare collection journal article supplement (https://gsajournals.figshare.com/articles/dataset/_/11323088)
Supplement: Supplementary file 37 [file 1]

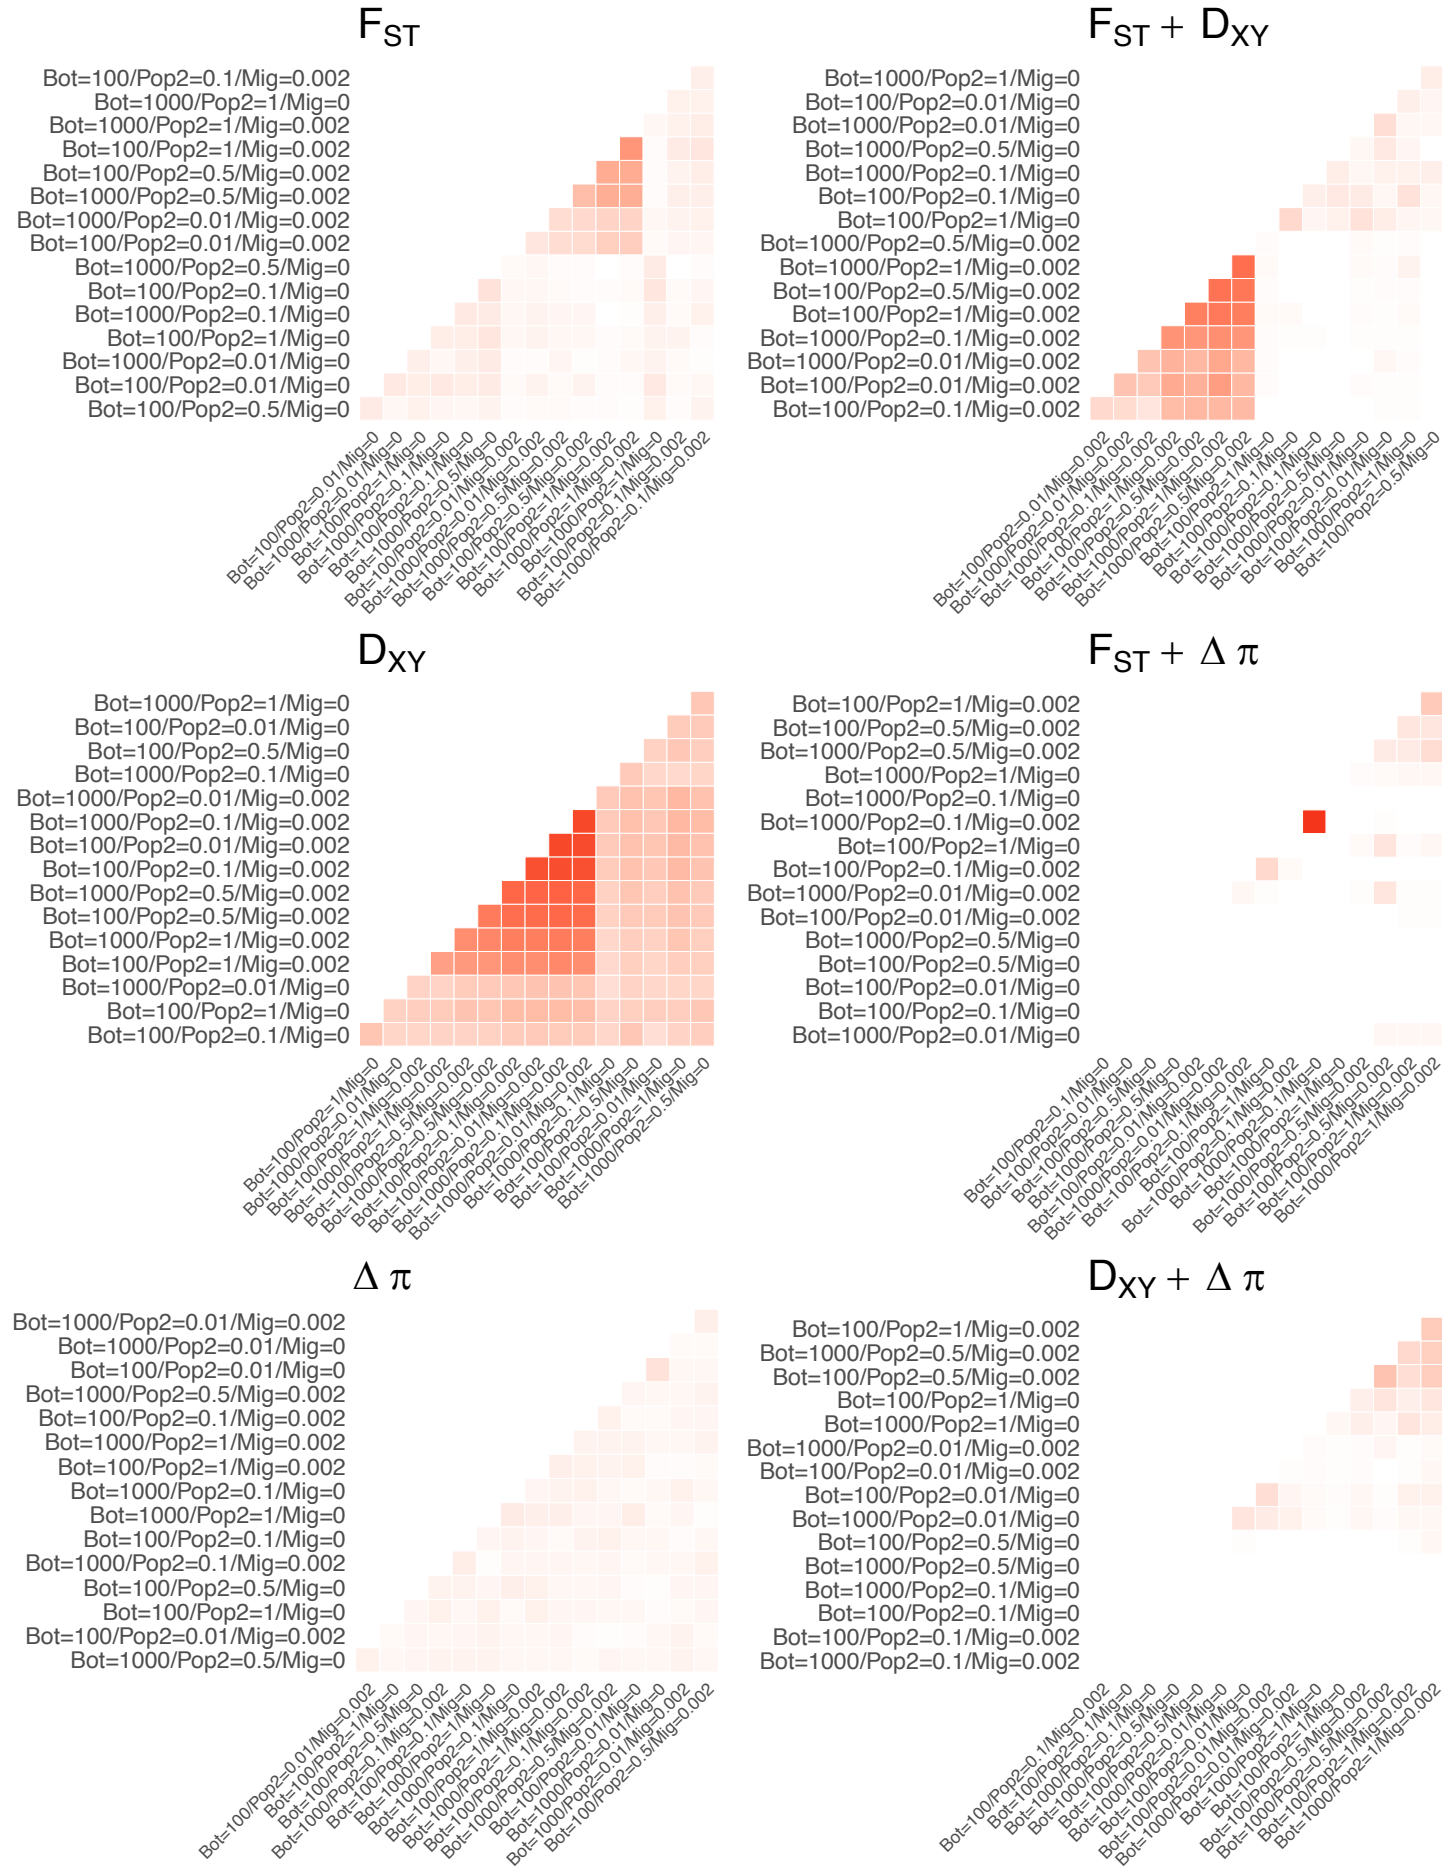

**Figure S45:** The proportional overlap of outliers above the 95% quantile, averaged across 100 downsampled datasets consisting of 95% Neutral and 5%  $\text{Pheno}_{\text{Div}}$  data for each of the 16 demographic treatments after 10,000 generations for  $\mu_o = 0.1$  simulations. Axis orderings were determined through hierarchical clustering. Heatmaps are shown for single measures of  $F_{\text{ST}}$ ,  $D_{\text{XY}}$  and  $\Delta\pi$  in the first column, and combined measures in the second column. Heatmaps are coloured according to a common scale of 0 to 1. Treatments are labelled with founding bottleneck (Bot), DP population size (Pop2), and migration (Mig) values.
