# Supplementary material
Source: publisher figshare collection journal article supplement (https://gsajournals.figshare.com/articles/dataset/_/11323088)
Supplement: Supplementary file 47 [file 1]

**A**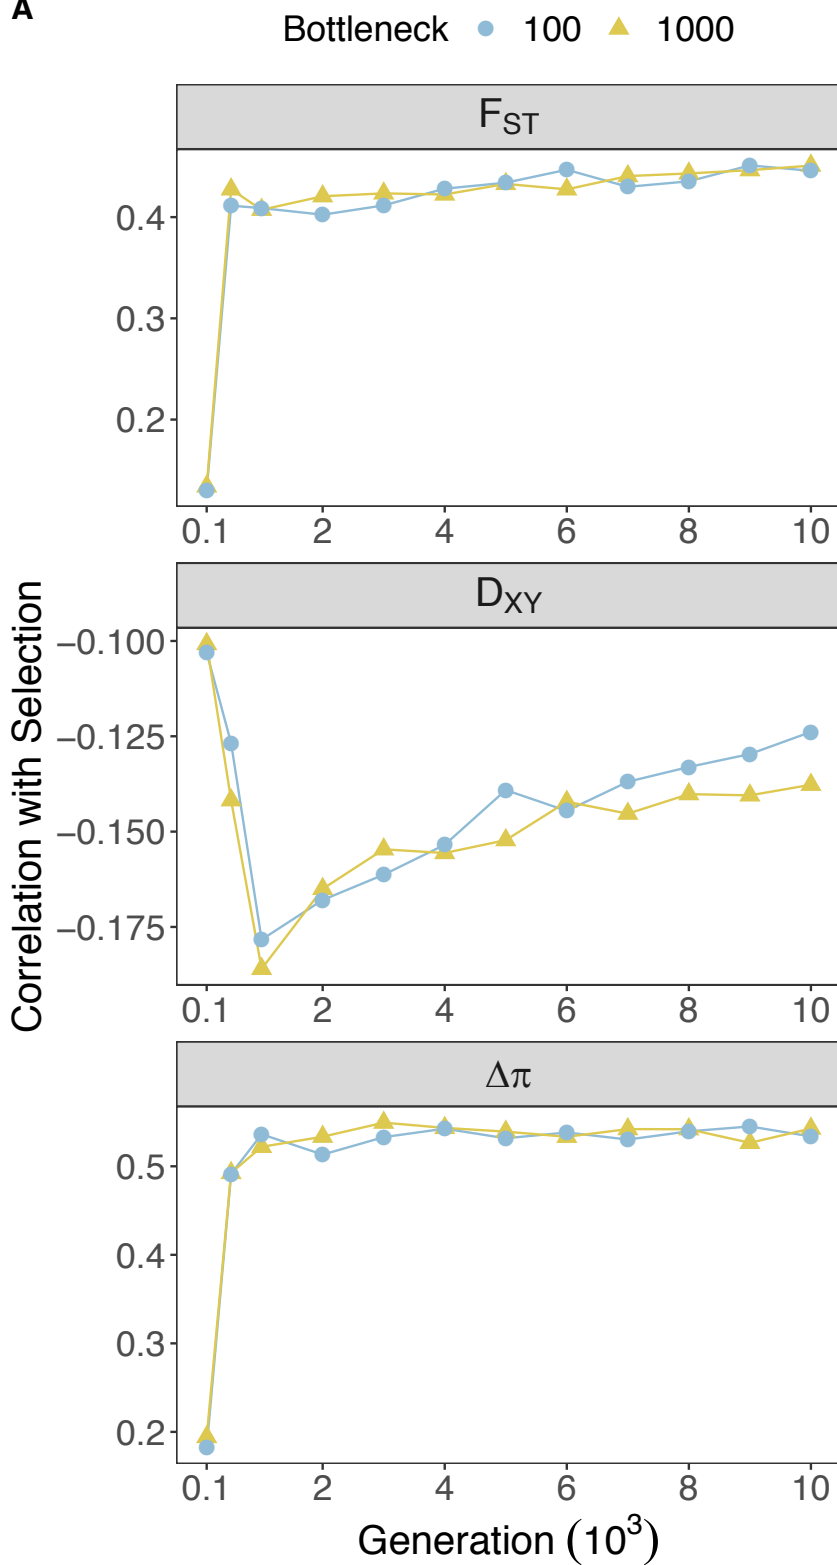**B**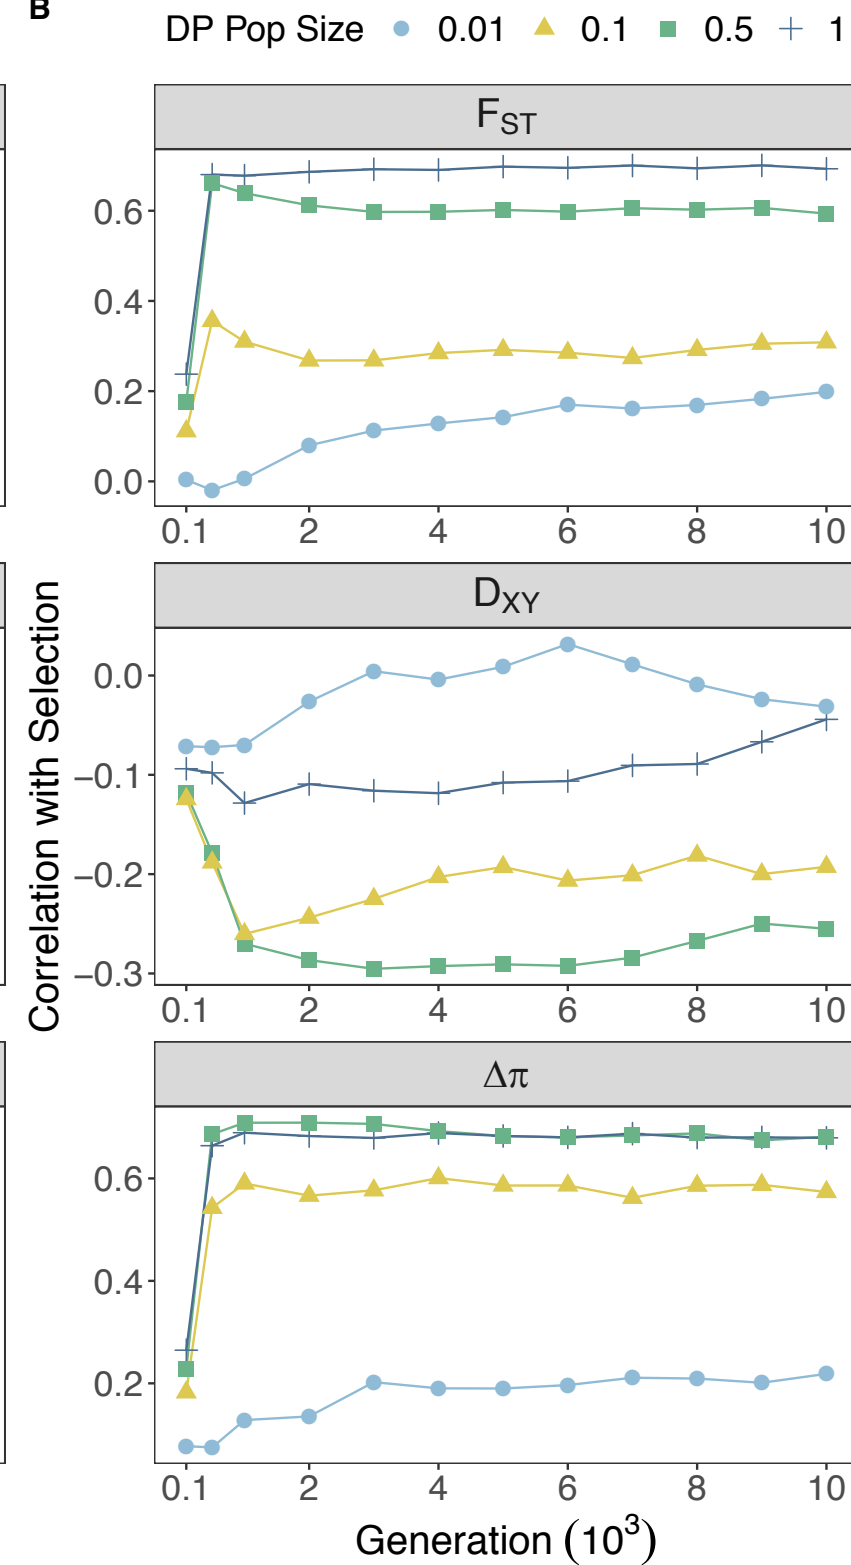**C**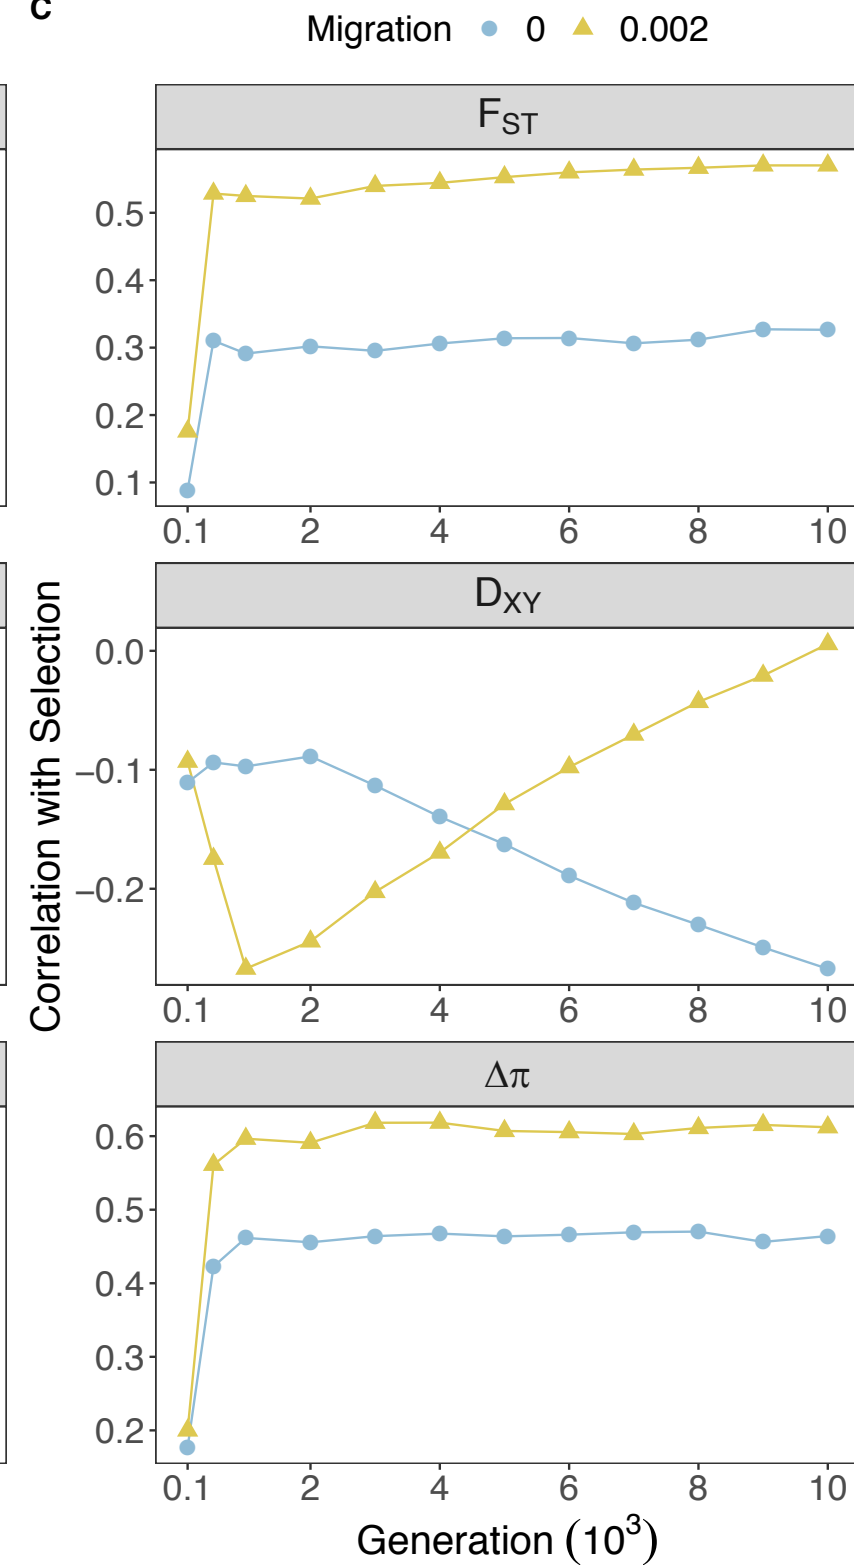

**Figure S6:** Effects of demographic treatments on the relationship between selection and measures of genetic divergence across all sampling generations for  $\mu = 4.89\text{e-}5$  simulations. Point colour and shape denote treatment groups for founding bottlenecks (**A**), prolonged bottlenecks (**B**) and migration (**C**). Each point represents correlation coefficients calculated across all genes within individual treatments groups, averaged within treatment levels, and averaged over 20 iterations.
